# Supplementary material for: Hydrogen-bonding-assisted redox-neutral construction of tetrahydroquinolines via hydride transfer
Source: Royal Society of Chemistry journal article supplement (doi:10.1039/d0ob00521e), 2020-01-01

# Supporting Information

## Hydrogen-bonding-assisted redox-neutral construction of tetrahydroquinolines via hydride transfer

Xiaoyu Yang,<sup>a,§</sup> Fangzhi Hu,<sup>a,§</sup> Liang Wang,<sup>a,b</sup> Lubin Xu,<sup>a</sup> Shuai-Shuai Li<sup>\*,a,b</sup>

<sup>a</sup> College of Chemistry and Pharmaceutical Sciences, Qingdao Agricultural University, Qingdao, 266109, China.

<sup>b</sup> College of Chemistry and Molecular Engineering, Qingdao University of Science and Technology, Zhengzhou Rd.  
#53, Qingdao 266042, China

### Table of Contents

|                                                             |            |
|-------------------------------------------------------------|------------|
| <b>1. General Information.....</b>                          | <b>S2</b>  |
| <b>2. General Procedure.....</b>                            | <b>S2</b>  |
| <b>3. Characterization of Products.....</b>                 | <b>S3</b>  |
| <b>4. <sup>1</sup>H and <sup>13</sup>C NMR Spectra.....</b> | <b>S12</b> |

## 1. General Information

Unless otherwise noted, all reagents and solvents were purchased from the commercial sources and used as received. Thin layer chromatography (TLC) was used to monitor the reaction on Merck 60 F254 precoated silica gel plate (0.2 mm thickness). TLC spots were visualized by UV-light irradiation on Spectroline Model ENF-24061/F 254 nm. The products were purified by flash column chromatography (200-300 mesh silica gel) eluted with the gradient of petroleum ether and ethyl acetate. Proton nuclear magnetic resonance spectra ( $^1\text{H NMR}$ ) were recorded on a Bruker 500 MHz NMR spectrometer ( $\text{CDCl}_3$  or  $\text{DMSO-d}_6$  solvent). The chemical shifts were reported in parts per million (ppm), downfield from  $\text{SiMe}_4$  ( $\delta$  0.0) and relative to the signal of chloroform-d ( $\delta$  7.26, singlet) or dimethyl sulfoxide-d<sub>6</sub> ( $\delta$  2.54, singlet). Multiplicities were afforded as: s (singlet); d (doublet); t (triplet); q (quartet); dd (doublets of doublet) or m (multiplets). The number of protons for a given resonance is indicated by nH. Coupling constants were reported as a *J* value in Hz. Carbon nuclear magnetic resonance spectra ( $^{13}\text{C NMR}$ ) was referenced to the appropriate residual solvent peak. High resolution mass spectral analysis (HRMS) was performed on Waters XEVO G2 Q-TOF. All substituted 2-fluorobenzaldehydes, and all compounds containing active methylene were purchased from adamas-beta. All *o*-aminobenzaldehydes<sup>1</sup> were prepared according to literature.

## 2. General Procedure

### 2.1 General Procedure for the Synthesis of Tetrahydroquinoline Derivatives

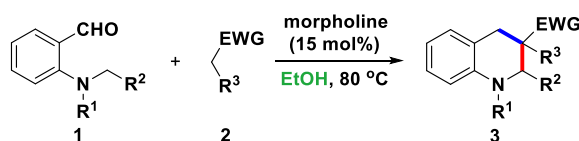

A reaction tube was charged with *o*-aminobenzaldehyde **1** (0.3 mmol), compound containing active methylene **2** (0.36 mmol), morpholine (15 mol%) and EtOH (3.0 mL). The mixture was stirred at 80 °C under an air atmosphere. Upon completion of the reaction as indicated by TLC analysis, the mixture was concentrated in vacuum and the residue was directly purified by flash column chromatography on silica gel (eluent: ethyl acetate/petroleum ether, 1:100) to afford the desired 3,3'-difunctionalized tetrahydroquinoline derivative **3**.

### 2.2 General Procedure for the Synthesis of PNU-286607

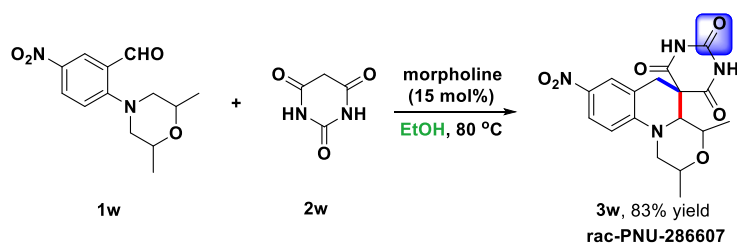

A reaction tube was charged with *o*-aminobenzaldehyde **1w** (0.3 mmol), barbituric acid **2w** (0.36 mmol), morpholine (15 mol%) and EtOH (3.0 mL). The mixture was stirred at 80 °C under an air atmosphere. Upon completion of the reaction as indicated by TLC analysis, the mixture was concentrated in vacuum and the residue was directly purified by flash column chromatography on silica gel (eluent: ethyl acetate/petroleum ether, 1:5) to afford the desired PNU-286607 **3w** in 83%

yield.

### 2.3 General Procedure for the Large-scale Synthesis of 3a

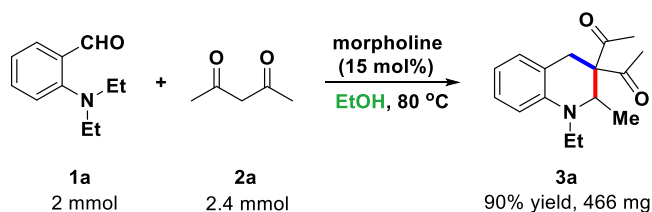

A round-bottomed flask was charged with *o*-aminobenzaldehyde **1a** (2 mmol), 2,4-pentanedione **2a** (2.4 mmol), morpholine (15 mol%) and EtOH (20 mL). The mixture was stirred at 80 °C under an air atmosphere. Upon completion of the reaction as indicated by TLC analysis, the mixture was concentrated in vacuum and the residue was directly purified by flash column chromatography on silica gel (eluent: ethyl acetate/petroleum ether, 1:100) to afford the desired 3,3'-diacetyl substituted tetrahydroquinoline **3a** in 90% yield (466 mg).

### 2.4 General Procedure for the Control Experiments

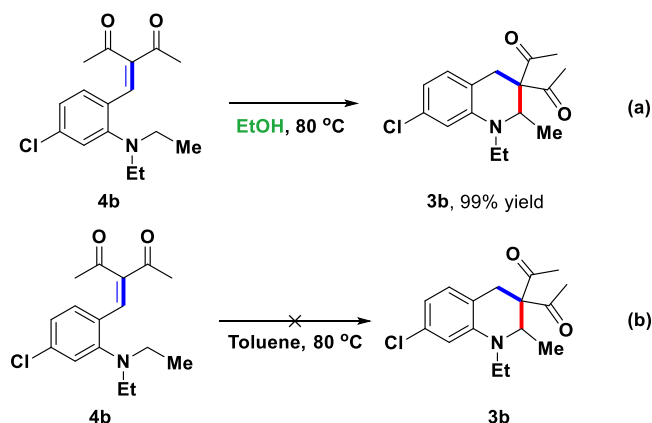

A reaction tube was charged with alkene **4b** (0.1 mmol), and EtOH (1 mL). The mixture was stirred at 80 °C under an air atmosphere. Upon completion of the reaction as indicated by TLC analysis, the alkene **4b** could convert to the cyclic product **3b** absolutely. However, not any reaction occurred at all when alkene **4b** was subjected to toluene at 80 °C.

## 3. Characterization of Products

### 1,1'-(1-ethyl-2-methyl-1,2,3,4-tetrahydroquinoline-3,3-diyl)bis(ethan-1-one) (**3a**)

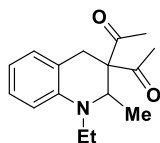

Flash column chromatography on a silica gel (ethyl acetate: petroleum ether, 1:100) afforded the product (74.6 mg, 96% yield) as a pale yellow oil.

**<sup>1</sup>H NMR** (500 MHz, CDCl<sub>3</sub>) δ 7.10 (d, *J* = 7.5 Hz, 1H), 7.07 (t, *J* = 7.8 Hz, 1H), 6.64 (td, *J* = 7.3, 1.0 Hz, 1H), 6.53 (d, *J* = 8.2 Hz, 1H), 4.37 (qd, *J* = 6.4, 1.8 Hz, 1H), 3.51 (dd, *J* = 16.7, 1.5 Hz, 1H), 3.39 (dt, *J* = 14.1, 7.1 Hz, 1H), 3.30 (dt, *J* = 14.7, 7.3 Hz, 1H), 3.14 (d, *J* = 16.7 Hz, 1H), 2.17 (s, 3H), 2.07 (s, 3H), 1.23 (t, *J* = 7.1 Hz, 3H), 0.98 (d, *J* = 6.5 Hz, 3H); **<sup>13</sup>C NMR** (126 MHz, CDCl<sub>3</sub>) δ 204.5, 203.7, 142.4, 129.5, 127.6, 118.1, 116.3, 111.1, 70.2, 55.9, 45.0, 27.8, 26.4, 25.5, 15.2, 12.9. **HRMS (ESI)**: calcd. for C<sub>16</sub>H<sub>22</sub>NO<sub>2</sub> [M+H]<sup>+</sup>: 260.1651, found: 260.1654.

**1,1'-(7-chloro-1-ethyl-2-methyl-1,2,3,4-tetrahydroquinoline-3,3-diyl)bis(ethan-1-one) (3b)**

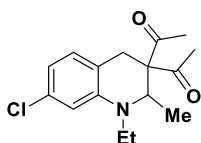

Flash column chromatography on a silica gel (ethyl acetate: petroleum ether, 1:100) afforded the product (84.3 mg, 96% yield) as a pale yellow oil.

**<sup>1</sup>H NMR** (500 MHz, CDCl<sub>3</sub>) δ 7.00 (d, *J* = 7.9 Hz, 1H), 6.60 (dd, *J* = 8.0, 1.9 Hz, 1H), 6.48 (d, *J* = 1.8 Hz, 1H), 4.36 (dd, *J* = 6.5, 1.7 Hz, 1H), 3.50 – 3.43 (m, 1H), 3.41 – 3.23 (m, 2H), 3.07 (d, *J* = 16.8 Hz, 1H), 2.16 (d, *J* = 5.6 Hz, 3H), 2.06 (s, 3H), 1.23 (t, *J* = 7.1 Hz, 3H), 0.97 (d, *J* = 6.5 Hz, 3H); **<sup>13</sup>C NMR** (126 MHz, CDCl<sub>3</sub>) δ 204.0, 203.3, 143.5, 133.2, 130.4, 116.5, 116.1, 110.8, 70.0, 55.6, 45.0, 27.2, 26.4, 25.5, 15.4, 12.6. **HRMS (ESI)**: calcd. for C<sub>16</sub>H<sub>21</sub>ClNO<sub>2</sub> [M+H]<sup>+</sup>: 294.1261, found: 294.1265.

**1,1'-(5-bromo-1-ethyl-2-methyl-1,2,3,4-tetrahydroquinoline-3,3-diyl)bis(ethan-1-one) (3c)**

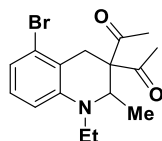

Flash column chromatography on a silica gel (ethyl acetate: petroleum ether, 1:100) afforded the product (92.0 mg, 91% yield) as a pale yellow oil.

**<sup>1</sup>H NMR** (500 MHz, CDCl<sub>3</sub>) δ 6.94 – 6.89 (m, 2H), 6.47 (dd, *J* = 6.4, 3.0 Hz, 1H), 4.36 (tt, *J* = 6.5, 3.2 Hz, 1H), 3.77 (dd, *J* = 17.4, 1.6 Hz, 1H), 3.35 (ddt, *J* = 31.0, 14.8, 7.3 Hz, 2H), 2.91 (d, *J* = 17.4 Hz, 1H), 2.20 (s, 3H), 2.06 (s, 3H), 1.22 (t, *J* = 7.1 Hz, 3H), 0.97 (d, *J* = 6.5 Hz, 3H); **<sup>13</sup>C NMR** (126 MHz, CDCl<sub>3</sub>) δ 203.9, 203.2, 144.1, 128.3, 125.8, 120.2, 117.6, 110.2, 70.2, 55.8, 45.4, 28.7, 26.5, 25.4, 15.1, 12.7. **HRMS (ESI)**: calcd. for C<sub>16</sub>H<sub>21</sub>BrNO<sub>2</sub> [M+H]<sup>+</sup>: 338.0756, found: 338.0760.

**1,1'-(1-methyl-1,2,3,4-tetrahydroquinoline-3,3-diyl)bis(ethan-1-one) (3d)**

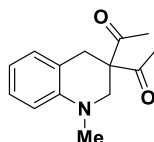

Flash column chromatography on a silica gel (ethyl acetate: petroleum ether, 1:100) afforded the product (52.7 mg, 76% yield) as a pale yellow oil.

**<sup>1</sup>H NMR** (500 MHz, CDCl<sub>3</sub>) δ 7.09 (t, *J* = 7.7 Hz, 2H), 6.70 (t, *J* = 7.3 Hz, 1H), 6.59 (d, *J* = 8.0 Hz, 1H), 3.61 (s, 2H), 3.28 (s, 2H), 2.91 (s, 3H), 2.17 (s, 6H); **<sup>13</sup>C NMR** (126 MHz, CDCl<sub>3</sub>) δ 204.1, 145.5, 129.3, 127.5, 119.7, 117.8, 111.5, 66.0, 54.3, 39.2, 32.4, 25.9. **HRMS (ESI)**: calcd. for C<sub>14</sub>H<sub>18</sub>NO<sub>2</sub> [M+H]<sup>+</sup>: 232.1338, found: 232.1340.

**1,1'-(5-chloro-1-methyl-1,2,3,4-tetrahydroquinoline-3,3-diyl)bis(ethan-1-one) (3e)**

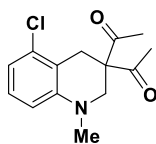

Flash column chromatography on a silica gel (ethyl acetate: petroleum ether, 1:100) afforded the product (60.4 mg, 76% yield) as a pale yellow oil.

$^1\text{H NMR}$  (500 MHz,  $\text{CDCl}_3$ )  $\delta$  7.00 (t,  $J = 8.1$  Hz, 1H), 6.77 (d,  $J = 7.9$  Hz, 1H), 6.48 (d,  $J = 8.3$  Hz, 1H), 3.59 (s, 2H), 3.28 (s, 2H), 2.91 (s, 3H), 2.17 (s, 6H);  $^{13}\text{C NMR}$  (126 MHz,  $\text{CDCl}_3$ )  $\delta$  203.6, 147.1, 134.5, 127.7, 118.4, 117.8, 109.9, 65.7, 53.8, 39.6, 30.1, 25.8. **HRMS (ESI)**: calcd. for  $\text{C}_{14}\text{H}_{17}\text{ClNO}_2$   $[\text{M}+\text{H}]^+$ : 266.0948, found: 266.0955.

**1,1'-(1,2,3,3a,4,5-hexahydropyrrolo[1,2-a]quinoline-4,4-diyl)bis(ethan-1-one) (3f)**

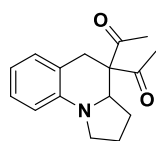

Flash column chromatography on a silica gel (ethyl acetate: petroleum ether, 1:100) afforded the product (65.5 mg, 85% yield) as a pale yellow oil.

$^1\text{H NMR}$  (500 MHz,  $\text{CDCl}_3$ )  $\delta$  7.12 (t,  $J = 7.7$  Hz, 1H), 7.07 (d,  $J = 7.4$  Hz, 1H), 6.64 (td,  $J = 7.4, 1.0$  Hz, 1H), 6.48 (d,  $J = 8.0$  Hz, 1H), 3.70 – 3.62 (m, 1H), 3.32 – 3.23 (m, 3H), 3.15 (d,  $J = 16.5$  Hz, 1H), 2.21 (tdd,  $J = 6.2, 4.8, 1.7$  Hz, 1H), 2.18 (s, 3H), 2.03 – 1.97 (m, 1H), 1.96 (s, 3H), 1.96 – 1.88 (m, 2H);  $^{13}\text{C NMR}$  (126 MHz,  $\text{CDCl}_3$ )  $\delta$  207.7, 205.7, 144.2, 128.7, 128.0, 118.2, 116.4, 111.4, 63.9, 61.3, 46.9, 34.6, 29.2, 27.7, 27.6, 23.2. **HRMS (ESI)**: calcd. for  $\text{C}_{16}\text{H}_{20}\text{NO}_2$   $[\text{M}+\text{H}]^+$ : 258.1494, found: 258.1498.

**1,1'-5,6,6a,6b,7,8,9,10,10a,11-decahydroisindolo[2,1-a]quinoline-6,6-diyl)bis(ethan-1-one) (3g)**

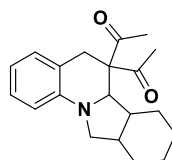

Flash column chromatography on a silica gel (ethyl acetate: petroleum ether, 1:100) afforded the product (74.6 mg, 80% yield) as a pale yellow oil.

$^1\text{H NMR}$  (500 MHz,  $\text{CDCl}_3$ )  $\delta$  7.10 (t,  $J = 7.7$  Hz, 1H), 7.04 (d,  $J = 7.3$  Hz, 1H), 6.60 (t,  $J = 7.3$  Hz, 1H), 6.45 (d,  $J = 8.1$  Hz, 1H), 3.72 (d,  $J = 6.9$  Hz, 1H), 3.28 – 3.22 (m, 2H), 3.20 (s, 2H), 2.71 – 2.63 (m, 1H), 2.20 (s, 3H), 2.17 – 2.10 (m, 1H), 1.92 (s, 3H), 1.78 – 1.70 (m, 1H), 1.69 – 1.61 (m, 1H), 1.61 – 1.52 (m, 1H), 1.51 – 1.43 (m, 2H), 1.37 (tdd,  $J = 12.4, 6.2, 3.3$  Hz, 3H);  $^{13}\text{C NMR}$  (126 MHz,  $\text{CDCl}_3$ )  $\delta$  207.7, 206.9, 144.2, 128.6, 128.0, 117.3, 115.7, 111.1, 64.7, 62.9, 52.0, 38.7, 36.5, 36.1, 29.0, 28.2, 27.2, 26.9, 23.9, 22.4. **HRMS (ESI)**: calcd. for  $\text{C}_{20}\text{H}_{26}\text{NO}_2$   $[\text{M}+\text{H}]^+$ : 312.1964, found: 312.1970.

**1,1'-(2,3,4,4a,5,6-hexahydro-1H-pyrido[1,2-a]quinoline-5,5-diyl)bis(ethan-1-one) (3h)**

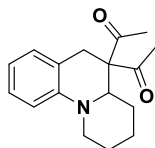

Flash column chromatography on a silica gel (ethyl acetate: petroleum ether, 1:100) afforded the product (57.7 mg, 71% yield) as a pale yellow oil.

**<sup>1</sup>H NMR** (500 MHz, CDCl<sub>3</sub>) δ 7.10 (d, *J* = 7.4 Hz, 1H), 7.07 (t, *J* = 7.8 Hz, 1H), 6.74 (d, *J* = 8.3 Hz, 1H), 6.68 (t, *J* = 7.3 Hz, 1H), 4.23 (d, *J* = 11.2 Hz, 1H), 4.04 (d, *J* = 14.2 Hz, 1H), 3.59 (d, *J* = 16.2 Hz, 1H), 3.11 – 2.99 (m, 2H), 2.15 (s, 6H), 1.85-1.80 (m, 1H), 1.79-1.73 (m, 1H), 1.63 – 1.55 (m, 1H), 1.46 – 1.36 (m, 2H), 1.35 – 1.27 (m, 1H); **<sup>13</sup>C NMR** (126 MHz, CDCl<sub>3</sub>) δ 204.6, 203.7, 143.3, 129.9, 127.7, 120.3, 117.5, 113.0, 69.9, 60.2, 49.3, 28.5, 26.6, 25.7, 24.9, 24.8, 21.7. **HRMS (ESI)**: calcd. for C<sub>17</sub>H<sub>22</sub>NO<sub>2</sub> [M+H]<sup>+</sup>: 272.1651, found: 272.1654.

**1,1'-(7,11b,12,13-tetrahydro-6H-isoquinolino[2,1-a]quinoline-12,12-diyl)bis(ethan-1-one) (3i)**

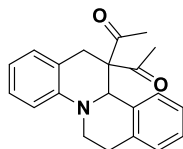

Flash column chromatography on a silica gel (ethyl acetate: petroleum ether, 1:100) afforded the product (91.9 mg, 96% yield) as a pale yellow oil.

**<sup>1</sup>H NMR** (500 MHz, CDCl<sub>3</sub>) δ 7.10 (t, *J* = 7.4 Hz, 1H), 7.07 – 6.99 (m, 4H), 6.83 (d, *J* = 8.2 Hz, 1H), 6.71 (d, *J* = 8.1 Hz, 1H), 6.68 (t, *J* = 7.2 Hz, 1H), 5.61 (s, 1H), 4.09 (ddd, *J* = 13.8, 6.5, 2.2 Hz, 1H), 3.71 (dd, *J* = 16.1, 1.3 Hz, 1H), 3.59 (ddd, *J* = 13.8, 11.5, 5.4 Hz, 1H), 3.29 – 3.15 (m, 2H), 2.73 (dd, *J* = 16.8, 3.4 Hz, 1H), 2.36 (s, 3H), 2.22 (s, 3H); **<sup>13</sup>C NMR** (126 MHz, CDCl<sub>3</sub>) δ 205.8, 203.1, 143.6, 136.3, 136.1, 129.6, 129.6, 127.3, 126.9, 125.9, 125.0, 121.4, 118.6, 113.4, 70.9, 60.4, 46.4, 28.9, 27.0, 25.2, 24.9. **HRMS (ESI)**: calcd. for C<sub>21</sub>H<sub>22</sub>NO<sub>2</sub> [M+H]<sup>+</sup>: 320.1651, found: 320.1655.

**1,1'-(5,6,6a,7,8,9,10,11-octahydroazepino[1,2-a]quinoline-6,6-diyl)bis(ethan-1-one) (3j)**

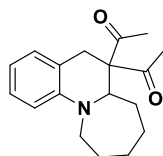

Flash column chromatography on a silica gel (ethyl acetate: petroleum ether, 1:100) afforded the product (70.9 mg, 83% yield) as a pale yellow oil.

**<sup>1</sup>H NMR** (500 MHz, CDCl<sub>3</sub>) δ 7.09 (d, *J* = 7.4 Hz, 1H), 7.05 (t, *J* = 7.7 Hz, 1H), 6.62 (t, *J* = 7.3 Hz, 1H), 6.53 (d, *J* = 8.2 Hz, 1H), 4.31 – 4.22 (m, 1H), 3.88 (ddd, *J* = 15.0, 6.2, 2.8 Hz, 1H), 3.55 (d, *J* = 16.6 Hz, 1H), 3.22 – 3.11 (m, 2H), 2.17 (s, 3H), 2.13 – 2.02 (m, 4H), 1.71-1.65 (m, 2H), 1.58 – 1.51 (m, 3H), 1.41-1.34 (m, 1H), 1.31-1.24 (m, 1H); **<sup>13</sup>C NMR** (126 MHz, CDCl<sub>3</sub>) δ 204.6, 203.6, 142.9, 129.6, 127.6, 117.4, 116.1, 110.4, 69.7, 61.0, 49.9, 31.3, 28.0, 26.7, 26.5, 26.2, 26.1, 25.4. **HRMS (ESI)**: calcd. for C<sub>18</sub>H<sub>24</sub>NO<sub>2</sub> [M+H]<sup>+</sup>: 286.1807, found: 286.1804.

**ethyl 3-acetyl-1-ethyl-2-methyl-1,2,3,4-tetrahydroquinoline-3-carboxylate (3k)**

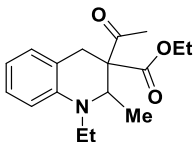

Flash column chromatography on a silica gel (ethyl acetate: petroleum ether, 1:100) afforded the product (81.5 mg, 94% yield) as a pale yellow oil and the diastereoselectivity was 1.6:1.

**<sup>1</sup>H NMR** (500 MHz, CDCl<sub>3</sub>) δ 7.06 (dd, *J* = 13.3, 6.1 Hz, 2H), 6.60 (dd, *J* = 11.8, 7.0 Hz, 1H), 6.52 (t, *J* = 7.0 Hz, 1H), 4.30 – 4.16 (m, 2H), 4.15 – 3.93 (m, 1H), 3.47 – 3.25 (m, 3H), 3.16 (dd, *J* = 25.7, 16.8 Hz, 1H), 2.25 (s, 1H), 2.15 (s, 2H), 1.28 (t, *J* = 7.1 Hz, 2H), 1.22 (q, *J* = 7.3 Hz, 3H), 1.12 – 1.05 (m, 3H), 0.98 (d, *J* = 6.5 Hz, 1H); **<sup>13</sup>C NMR** (126 MHz, CDCl<sub>3</sub>) δ 203.1, 201.9, 169.7, 169.5, 142.3, 142.2, 129.4, 129.3, 127.5, 127.3, 118.4, 118.0, 116.0, 115.8, 110.9, 110.6, 63.11 (s), 62.2, 61.7, 61.6, 55.8, 55.6, 44.9, 44.8, 28.0, 27.8, 26.4, 25.4, 15.7, 15.3, 14.0, 13.8, 13.0, 12.9. **HRMS (ESI)**: calcd. for C<sub>17</sub>H<sub>24</sub>NO<sub>3</sub> [M+H]<sup>+</sup>: 290.1756, found: 290.1760.

**ethyl 6-acetyl-5,6,6a,7,8,9,10,11-octahydroazepino[1,2-a]quinoline-6-carboxylate (3l) (dr = 2:1)**

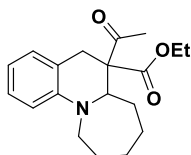

Flash column chromatography on a silica gel (ethyl acetate: petroleum ether, 1:100) afforded the product (73.7 mg, 78% yield) as a pale yellow oil and the diastereoselectivity was 2:1.

**<sup>1</sup>H NMR** (500 MHz, CDCl<sub>3</sub>) δ 7.08 – 7.00 (m, 2H), 6.58 (q, *J* = 6.9 Hz, 1H), 6.52 (dd, *J* = 8.1, 4.8 Hz, 1H), 4.25 – 4.00 (m, 3H), 3.92 – 3.84 (m, 1H), 3.47 – 3.31 (m, 1H), 3.17 (ddd, *J* = 14.7, 10.3, 5.0 Hz, 2H), 2.26 (s, 2H), 2.17 (s, 1H), 2.12 – 1.98 (m, 1H), 1.72 – 1.62 (m, 2H), 1.61 – 1.48 (m, 3H), 1.47 – 1.30 (m, 2H), 1.30 – 1.07 (m, 3H); **<sup>13</sup>C NMR** (126 MHz, CDCl<sub>3</sub>) δ 202.9, 202.1, 169.7, 169.4, 142.7, 142.6, 129.4, 129.3, 127.5, 127.4, 117.7, 117.5, 115.9, 115.6, 110.2, 109.9, 62.6, 61.7, 61.6, 61.5, 60.9, 60.6, 50.0, 49.8, 31.6, 30.7, 28.1, 27.9, 27.3, 26.9, 26.4, 26.3, 26.2, 26.0, 25.9, 25.3, 14.0, 13.9. **HRMS (ESI)**: calcd. for C<sub>19</sub>H<sub>26</sub>NO<sub>3</sub> [M+H]<sup>+</sup>: 316.1913, found: 316.1916.

**ethyl 6-(2,2,2-trifluoroacetyl)-5,6,6a,7,8,9,10,11-octahydroazepino[1,2-a]quinoline-6-carboxylate (3m)**

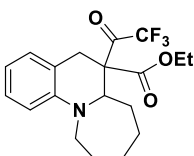

Flash column chromatography on a silica gel (ethyl acetate: petroleum ether, 1:100) afforded the product (90.7 mg, 82% yield) as a pale yellow oil and the diastereoselectivity was 2.3:1.

**<sup>1</sup>H NMR** (500 MHz, CDCl<sub>3</sub>) δ 7.09-7.03 (m, 2H), 6.64-6.53 (m, 2H), 4.29 – 4.21 (m, 1H), 4.18 – 4.05 (m, 2H), 3.89 (tdd, *J* = 15.0, 6.3, 3.0 Hz, 1H), 3.51 – 3.28 (m, 2H), 3.26 – 3.11 (m, 1H), 2.08 – 1.97 (m, 1H), 1.78 – 1.71 (m, 1H), 1.70 – 1.60 (m, 2H), 1.60 – 1.42 (m, 4H), 1.27 (t, *J* = 7.1 Hz, 2H), 1.15 – 1.09 (m, 1H); **<sup>13</sup>C NMR** (126 MHz, CDCl<sub>3</sub>) δ 186.8 (q, *J* = 40.3 Hz), 185.8 (q, *J* = 34.0 Hz), 167.7, 166.9, 142.5, 142.0, 134.2, 130.5, 129.2, 129.1, 128.0, 127.8, 119.6, 118.7, 116.2, 116.2, 115.9 (q, *J* = 294.8 Hz), 115.7 (q, *J* = 294.8 Hz), 115.7, 110.5, 110.4, 62.5, 62.2, 60.0, 59.2, 59.0, 57.9, 50.2, 50.1, 30.9, 30.8,

27.9, 27.8, 27.4, 27.1, 26.2, 25.9, 25.9, 25.8, 13.8, 13.8. **HRMS (ESI):** calcd. for C<sub>19</sub>H<sub>23</sub>F<sub>3</sub>NO<sub>3</sub> [M+H]<sup>+</sup>: 370.1630, found: 370.1636.

**ethyl 6-benzoyl-5,6,6a,7,8,9,10,11-octahydroazepino[1,2-a]quinoline-6-carboxylate (3n)**

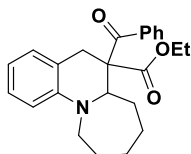

Flash column chromatography on a silica gel (ethyl acetate: petroleum ether, 1:100) afforded the product (100.6 mg, 89% yield) as a pale yellow oil and the diastereoselectivity was 1.2:1.

**<sup>1</sup>H NMR** (500 MHz, CDCl<sub>3</sub>) δ 7.94 (t, *J* = 6.1 Hz, 2H), 7.61 (d, *J* = 7.4 Hz, 2H), 7.55 (t, *J* = 7.4 Hz, 1H), 7.50 – 7.42 (m, 3H), 7.34 (t, *J* = 7.7 Hz, 2H), 7.09 – 6.98 (m, 3H), 6.88 (d, *J* = 7.4 Hz, 1H), 6.58 (t, *J* = 7.2 Hz, 2H), 6.54 – 6.44 (m, 2H), 4.38-4.35 (m, 1H), 4.29 – 4.18 (m, 3H), 4.13 – 3.98 (m, 2H), 3.97-3.92 (m, 1H), 3.65-3.60 (m, 1H), 3.56-3.48 (m, 2H), 3.37-3.40 (m, 1H), 3.28 – 3.18 (m, 2H), 2.74 – 2.65 (m, 1H), 2.08 – 1.98 (m, 1H), 1.97 – 1.88 (m, 1H), 1.81 (dt, *J* = 11.1, 4.9 Hz, 1H), 1.74 – 1.51 (m, 7H), 1.51 – 1.38 (m, 5H), 1.33 – 1.28 (m, 1H), 1.25 (t, *J* = 7.0 Hz, 3H), 1.02 (t, *J* = 7.1 Hz, 3H); **<sup>13</sup>C NMR** (126 MHz, CDCl<sub>3</sub>) δ 196.2, 195.5, 170.9, 170.6, 143.0, 142.6, 137.3, 137.0, 132.7, 131.6, 129.2, 129.2, 128.7, 128.7, 128.5, 128.4, 128.1, 127.6, 127.5, 117.8, 116.9, 115.5, 109.9, 109.9, 61.9, 61.5, 61.4, 60.5, 60.0, 59.3, 50.4, 49.7, 46.0, 31.1, 30.9, 30.7, 30.0, 27.3, 27.2, 26.3, 26.2, 25.9, 14.0, 13.9. **HRMS (ESI):** calcd. for C<sub>24</sub>H<sub>28</sub>NO<sub>3</sub> [M+H]<sup>+</sup>: 378.2069, found: 378.2073.

**ethyl 6-cyano-5,6,6a,7,8,9,10,11-octahydroazepino[1,2-a]quinoline-6-carboxylate (3o)**

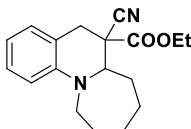

Flash column chromatography on a silica gel (ethyl acetate: petroleum ether, 1:100) afforded the product (81.3 mg, 91% yield) as a pale yellow oil and the diastereoselectivity was 9:1.

**<sup>1</sup>H NMR** (500 MHz, CDCl<sub>3</sub>) δ 7.09 (t, *J* = 7.8 Hz, 1H), 7.03 (d, *J* = 7.4 Hz, 1H), 6.68 (t, *J* = 7.4 Hz, 1H), 6.63 (d, *J* = 8.3 Hz, 1H), 4.31 – 4.15 (m, 2H), 3.90 (dd, *J* = 11.3, 3.9 Hz, 1H), 3.83 (dt, *J* = 15.4, 4.9 Hz, 1H), 3.52 (d, *J* = 16.6 Hz, 1H), 3.23 (d, *J* = 16.6 Hz, 1H), 3.20 – 3.13 (m, 1H), 2.15 – 1.98 (m, 2H), 1.78 – 1.62 (m, 4H), 1.42 (ddd, *J* = 13.2, 9.8, 4.3 Hz, 1H), 1.24 (t, *J* = 7.1 Hz, 3H); **<sup>13</sup>C NMR** (126 MHz, CDCl<sub>3</sub>) δ 166.6, 143.1, 128.9, 127.8, 118.3, 117.2, 116.6, 112.1, 62.8, 62.3, 49.7, 45.0, 31.8, 30.3, 28.2, 26.3, 26.0, 14.0. **HRMS (ESI):** calcd. for C<sub>18</sub>H<sub>23</sub>N<sub>2</sub>O<sub>2</sub> [M+H]<sup>+</sup>: 299.1760, found: 299.1763.

**6a,7,8,9,10,11-hexahydroazepino[1,2-a]quinoline-6,6(5H)-dicyanonitrile (3p)**

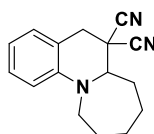

Flash column chromatography on a silica gel (ethyl acetate: petroleum ether, 1:100) afforded the product (74.5 mg, 99% yield) as a white solid.



**<sup>1</sup>H NMR** (500 MHz, CDCl<sub>3</sub>) δ 7.18 (t, *J* = 7.8 Hz, 1H), 7.02 (d, *J* = 7.5 Hz, 1H), 6.74 (t, *J* = 7.4 Hz, 2H), 3.96 (dt, *J* = 15.5, 5.0 Hz, 1H), 3.83 (dd, *J* = 11.2, 4.1 Hz, 1H), 3.45 (q, *J* = 16.6 Hz, 2H), 3.34 – 3.23 (m, 1H), 2.21 (dtd, *J* = 10.6, 7.2, 3.5 Hz, 1H), 2.13 – 2.01 (m, 1H), 1.85 – 1.57 (m, 5H), 1.43 (ddd, *J* = 19.6, 11.5, 3.6 Hz, 1H); **<sup>13</sup>C NMR** (126 MHz, CDCl<sub>3</sub>) δ 142.5, 129.2, 129.0, 117.8, 115.1, 114.9, 113.2, 112.6, 62.7, 49.9, 34.0, 33.6, 30.5, 27.9, 26.3, 25.7. **HRMS (ESI)**: calcd. for C<sub>16</sub>H<sub>18</sub>N<sub>3</sub> [M+H]<sup>+</sup>: 252.1501, found: 252.1505.

**1,2,3,3a-tetrahydropyrrolo[1,2-a]quinoline-4,4(5H)-dicarbonitrile (3q)**

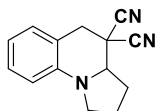

Flash column chromatography on a silica gel (ethyl acetate: petroleum ether, 1:100) afforded the product (59.5 mg, 89% yield) as a white solid.

**<sup>1</sup>H NMR** (500 MHz, CDCl<sub>3</sub>) δ 7.20 (t, *J* = 7.7 Hz, 1H), 7.05 (d, *J* = 7.5 Hz, 1H), 6.73 (t, *J* = 7.4 Hz, 1H), 6.58 (d, *J* = 8.2 Hz, 1H), 3.81 (dd, *J* = 8.6, 6.1 Hz, 1H), 3.59 – 3.50 (m, 2H), 3.49 – 3.37 (m, 2H), 2.53 (ddd, *J* = 14.3, 7.1, 2.0 Hz, 1H), 2.31 – 2.22 (m, 1H), 2.20 – 2.12 (m, 1H), 2.12 – 2.02 (m, 1H); **<sup>13</sup>C NMR** (126 MHz, CDCl<sub>3</sub>) δ 141.9, 129.3, 129.0, 117.6, 115.1, 113.5, 113.1, 112.2, 62.9, 47.8, 38.2, 33.9, 30.0, 22.8. **HRMS (ESI)**: calcd. for C<sub>14</sub>H<sub>14</sub>N<sub>3</sub> [M+H]<sup>+</sup>: 224.1188, found: 224.1190.

**6a,7,8,9,10,11-hexahydro-5H-spiro[azepino[1,2-a]quinoline-6,1'-cyclopentane]-2',5'-dione (3r)**

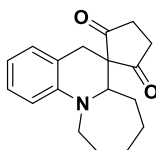

Flash column chromatography on a silica gel (ethyl acetate: petroleum ether, 1:100) afforded the product (72.4 mg, 85% yield) as a white solid.

**<sup>1</sup>H NMR** (500 MHz, DMSO) δ 7.08 – 6.99 (m, 2H), 6.66 – 6.55 (m, 2H), 3.86 – 3.72 (m, 2H), 3.20 – 2.96 (m, 4H), 2.74 – 2.60 (m, 1H), 2.58 – 2.50 (m, 2H), 1.97 (dd, *J* = 10.1, 4.4 Hz, 1H), 1.68 – 1.55 (m, 2H), 1.49 (dt, *J* = 8.5, 5.6 Hz, 2H), 1.45 – 1.32 (m, 3H); **<sup>13</sup>C NMR** (126 MHz, DMSO) δ 212.3, 211.7, 143.7, 129.3, 126.9, 118.8, 116.0, 110.9, 58.6, 58.3, 50.1, 35.8, 34.5, 29.7, 28.0, 25.9, 25.7, 25.1. **HRMS (ESI)**: calcd. for C<sub>18</sub>H<sub>22</sub>NO<sub>2</sub> [M+H]<sup>+</sup>: 284.1651, found: 284.1657.

**6a,7,8,9,10,11-hexahydro-5H-spiro[azepino[1,2-a]quinoline-6,1'-cyclohexane]-2',6'-dione (3s)**

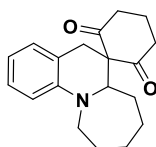

Flash column chromatography on a silica gel (ethyl acetate: petroleum ether, 1:100) afforded the product (79.3 mg, 89% yield) as a white solid.

**<sup>1</sup>H NMR** (500 MHz, CDCl<sub>3</sub>) δ 7.14 (d, *J* = 7.4 Hz, 1H), 7.02 (t, *J* = 7.7 Hz, 1H), 6.69 (t, *J* = 7.3 Hz, 1H), 6.55 (d, *J* = 8.2 Hz, 1H), 4.07 (dd, *J* = 9.1, 5.3 Hz, 1H), 4.05 – 3.96 (m, 1H), 3.32 (d, *J* = 17.4 Hz, 1H), 3.12 – 3.00 (m, 2H), 2.94 (d, *J* = 17.3 Hz, 1H), 2.83 (td, *J* = 14.2, 6.7 Hz, 1H), 2.65 (dd, *J* = 14.6, 1.9 Hz, 1H), 2.58 – 2.51 (m, 1H), 2.26 – 2.16 (m, 1H), 2.15 – 2.07 (m, 1H), 1.72 – 1.57 (m, 3H), 1.52 – 1.35 (m, 5H); **<sup>13</sup>C NMR** (126 MHz, CDCl<sub>3</sub>) δ 205.4, 203.9, 141.5, 129.3, 126.6, 119.8, 117.2, 110.9, 70.1, 64.4,

50.6, 37.9, 36.2, 30.0, 27.2, 25.9, 25.5, 23.6, 18.7. **HRMS (ESI):** calcd. for C<sub>19</sub>H<sub>24</sub>NO<sub>2</sub> [M+H]<sup>+</sup>: 298.1807, found: 298.1809.

**2',2'-dimethyl-6a,7,8,9,10,11-hexahydro-5H-spiro[azepino[1,2-a]quinoline-6,5'-[1,3]dioxane]-4',6'-dione (3t)**

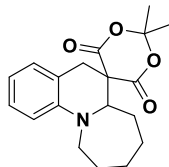

Flash column chromatography on a silica gel (ethyl acetate: petroleum ether, 1:100) afforded the product (97.7 mg, 99% yield) as a white solid.

**<sup>1</sup>H NMR** (500 MHz, CDCl<sub>3</sub>) δ 7.13 (t, *J* = 7.7 Hz, 1H), 7.08 (d, *J* = 7.5 Hz, 1H), 6.83 (d, *J* = 8.2 Hz, 1H), 6.77 (t, *J* = 7.4 Hz, 1H), 3.63 (dd, *J* = 12.3, 4.0 Hz, 1H), 3.54 – 3.45 (m, 2H), 3.41 (ddd, *J* = 15.9, 6.2, 2.7 Hz, 1H), 3.20 (d, *J* = 17.0 Hz, 1H), 1.99 – 1.87 (m, 3H), 1.84 – 1.77 (m, 4H), 1.76 – 1.67 (m, 4H), 1.62 (dddd, *J* = 17.1, 12.9, 8.6, 4.5 Hz, 1H), 1.47 (dd, *J* = 22.8, 11.2 Hz, 1H), 1.41 – 1.29 (m, 1H); **<sup>13</sup>C NMR** (126 MHz, CDCl<sub>3</sub>) δ 169.4, 166.5, 146.1, 128.6, 126.8, 119.7, 118.3, 115.1, 104.8, 67.6, 50.6, 50.4, 32.8, 30.7, 30.4, 29.5, 28.3, 27.6, 26.7. **HRMS (ESI):** calcd. for C<sub>19</sub>H<sub>24</sub>NO<sub>4</sub> [M+H]<sup>+</sup>: 330.1705, found: 330.1708.

**1',3'-dimethyl-6a,7,8,9,10,11-hexahydro-2'H,5H-spiro[azepino[1,2-a]quinoline-6,5'-pyrimidine]-2',4',6'(1'H,3'H)-trione (3u)**

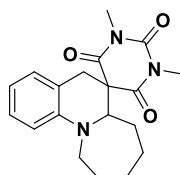

Flash column chromatography on a silica gel (ethyl acetate: petroleum ether, 1:100) afforded the product (93.1 mg, 91% yield) as a white solid.

**<sup>1</sup>H NMR** (500 MHz, CDCl<sub>3</sub>) δ 7.10 (dd, *J* = 13.5, 7.5 Hz, 2H), 6.74 (dd, *J* = 14.9, 7.7 Hz, 2H), 3.60 – 3.49 (m, 2H), 3.34 (s, 2H), 3.30 (s, 6H), 3.20 (ddd, *J* = 15.4, 8.1, 3.5 Hz, 1H), 2.02 – 1.90 (m, 1H), 1.73 – 1.64 (m, 2H), 1.64 – 1.53 (m, 3H), 1.49-1.42 (m, 1H), 1.39-1.31 (m, 1H); **<sup>13</sup>C NMR** (126 MHz, CDCl<sub>3</sub>) δ 170.1, 168.7, 151.7, 144.5, 128.6, 126.6, 120.4, 118.0, 113.4, 67.2, 53.3, 50.6, 30.1, 29.6, 29.5, 28.9, 28.8, 27.2, 26.0. **HRMS (ESI):** calcd. for C<sub>19</sub>H<sub>24</sub>N<sub>3</sub>O<sub>4</sub> [M+H]<sup>+</sup>: 342.1818, found: 342.1820.

**6a,7,8,9,10,11-hexahydro-5H-spiro[azepino[1,2-a]quinoline-6,3'-indolin]-2'-one (3v)**

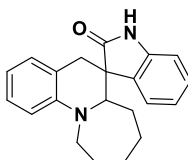

Flash column chromatography on a silica gel (ethyl acetate: petroleum ether, 1:20) afforded the product (66.7 mg, 70% yield) as a pale yellow solid and the diastereoselectivity was 1.7:1.

**<sup>1</sup>H NMR** (500 MHz, DMSO) δ 10.60 (s, 1H), 7.16 – 7.09 (m, 2H), 6.93 (d, *J* = 7.3 Hz, 1H), 6.88 (d, *J* = 7.7 Hz, 1H), 6.81 – 6.72 (m, 2H), 6.58 (t, *J* = 7.3 Hz, 1H), 6.52 (d, *J* = 7.5 Hz, 1H), 3.60 – 3.44 (m, 2H),

3.15 (d,  $J = 15.9$  Hz, 1H), 2.52 (d,  $J = 15.3$  Hz, 2H), 1.71 (d,  $J = 6.0$  Hz, 1H), 1.66 – 1.54 (m, 2H), 1.52 – 1.44 (m, 2H), 1.20 (ddd,  $J = 23.7, 18.2, 9.5$  Hz, 3H);  $^{13}\text{C}$  NMR (126 MHz, DMSO)  $\delta$  180.1, 147.4, 142.4, 130.6, 129.8, 128.2, 127.8, 125.1, 121.6, 119.9, 116.6, 112.7, 109.8, 62.6, 50.1, 49.5, 37.2, 29.8, 29.3, 29.0, 26.0. **HRMS (ESI)**: calcd. for  $\text{C}_{21}\text{H}_{23}\text{N}_2\text{O}$   $[\text{M}+\text{H}]^+$ : 319.1810, found: 319.1811.

**2',4'-dimethyl-8'-nitro-1',2',4',4a'-tetrahydro-2H,6'H-spiro[pyrimidine-5,5'-[1,4]oxazino[4,3-a]quinoline]-2,4,6(1H,3H)-trione (3w)**

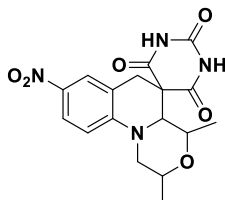

Flash column chromatography on a silica gel (ethyl acetate: petroleum ether, 1:100) afforded the product (93.1 mg, 83% yield) as a yellow solid.

$^1\text{H}$  NMR (500 MHz, DMSO)  $\delta$  11.71 (s, 2H), 7.98 (dd,  $J = 9.2, 2.7$  Hz, 1H), 7.84 (d,  $J = 2.1$  Hz, 1H), 7.04 (d,  $J = 9.4$  Hz, 1H), 4.30 (dd,  $J = 13.6, 1.9$  Hz, 1H), 3.92 (d,  $J = 9.0$  Hz, 1H), 3.60 (d,  $J = 15.0$  Hz, 2H), 3.54 (dd,  $J = 8.9, 6.4$  Hz, 1H), 2.99 (dd,  $J = 13.7, 10.7$  Hz, 1H), 2.88 (t,  $J = 9.8$  Hz, 1H), 1.17 (t,  $J = 5.4$  Hz, 3H), 0.95 (d,  $J = 6.4$  Hz, 3H);  $^{13}\text{C}$  NMR (126 MHz, DMSO)  $\delta$  171.6, 168.2, 150.9, 149.9, 136.1, 125.1, 124.5, 119.6, 111.2, 72.6, 71.5, 62.9, 53.2, 51.5, 37.4, 18.9, 18.6. **HRMS (ESI)**: calcd. for  $\text{C}_{17}\text{H}_{19}\text{N}_4\text{O}_6$   $[\text{M}+\text{H}]^+$ : 375.1305, found: 375.1309.

**2',4'-dimethyl-8'-nitro-2-thioxo-1',2,2',3,4',4a'-hexahydro-4H,6'H-spiro[pyrimidine-5,5'-[1,4]oxazino[4,3-a]quinoline]-4,6(1H)-dione (3x)**

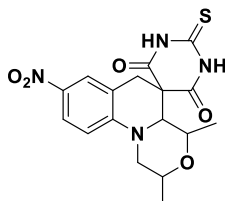

Flash column chromatography on a silica gel (ethyl acetate: petroleum ether, 1:100) afforded the product (115.8 mg, 99% yield) as a yellow solid.

$^1\text{H}$  NMR (500 MHz, DMSO)  $\delta$  12.97 (s, 1H), 12.71 (s, 1H), 7.98 (dd,  $J = 9.2, 2.7$  Hz, 1H), 7.87 (d,  $J = 2.2$  Hz, 1H), 7.05 (d,  $J = 9.4$  Hz, 1H), 4.30 (dd,  $J = 13.5, 1.6$  Hz, 1H), 3.90 (d,  $J = 9.0$  Hz, 1H), 3.67 – 3.55 (m, 2H), 3.50 (dd,  $J = 8.9, 6.4$  Hz, 1H), 3.00 (dd,  $J = 13.7, 10.8$  Hz, 1H), 2.90 (d,  $J = 15.0$  Hz, 1H), 1.16 (d,  $J = 6.1$  Hz, 3H), 0.92 (d,  $J = 6.3$  Hz, 3H);  $^{13}\text{C}$  NMR (126 MHz, DMSO)  $\delta$  183.4, 174.3, 170.7, 155.6, 141.0, 129.9, 129.4, 124.0, 116.1, 77.2, 76.3, 67.8, 57.9, 56.7, 41.9, 23.8, 23.3. **HRMS (ESI)**: calcd. for  $\text{C}_{17}\text{H}_{19}\text{N}_4\text{O}_5\text{S}$   $[\text{M}+\text{H}]^+$ : 391.1076, found: 391.1079.

Reference

1. Jurberg, I. D.; Peng, B.; Wçstefeld, E.; Wasserloos, M.; Maulide, N. *Angew. Chem. Int. Ed.* **2012**, *51*, 1950.

#### 4. <sup>1</sup>H and <sup>13</sup>C NMR Spectra

##### 1,1'-(1-ethyl-2-methyl-1,2,3,4-tetrahydroquinoline-3,3-diyl)bis(ethan-1-one) (3a)

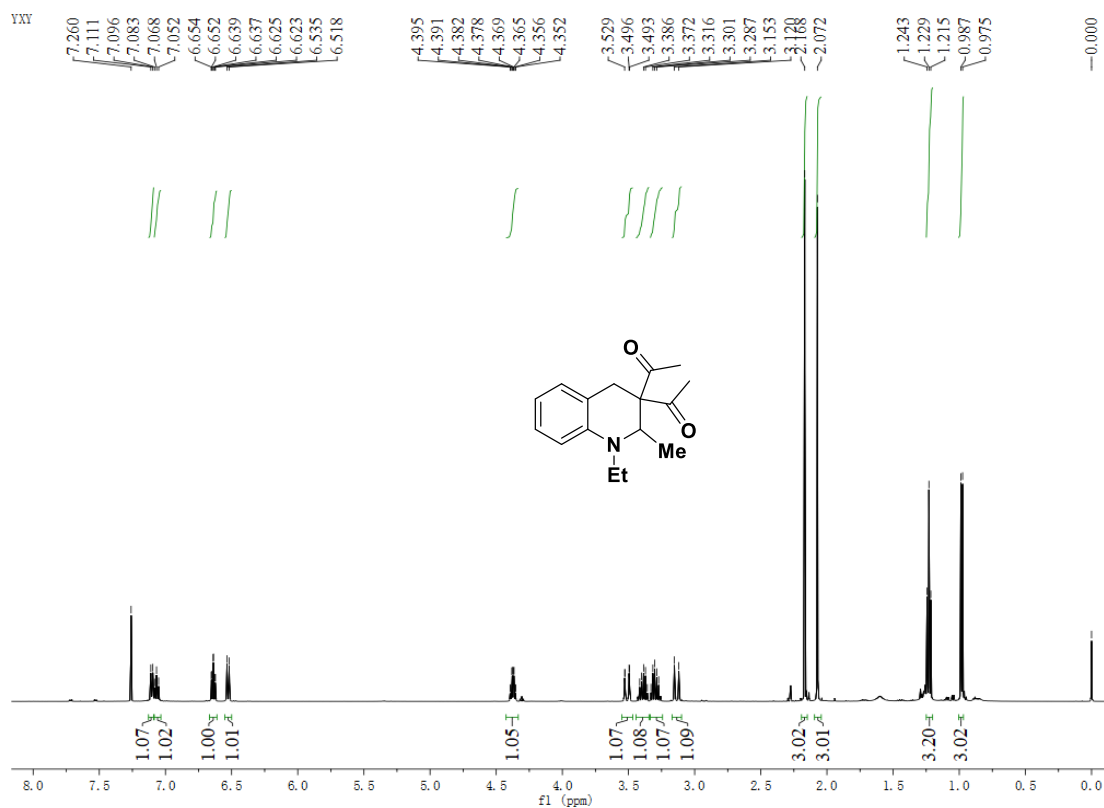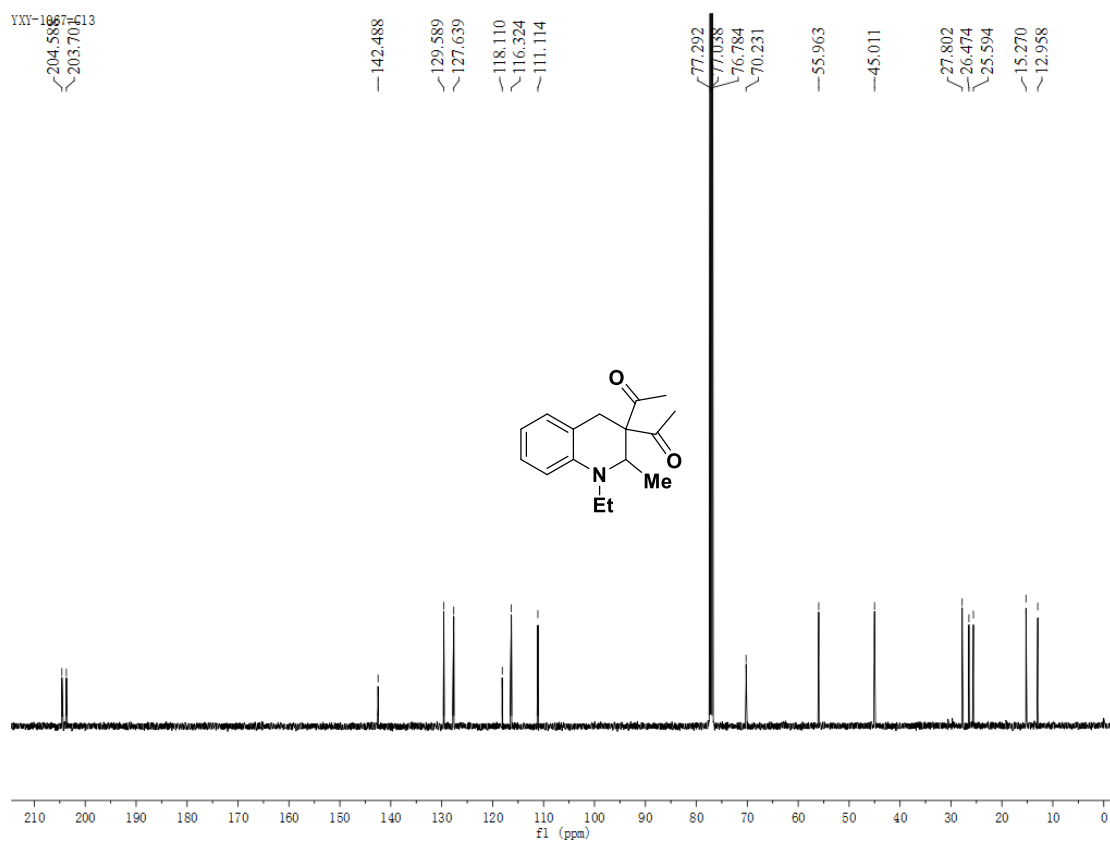

**1,1'-(7-chloro-1-ethyl-2-methyl-1,2,3,4-tetrahydroquinoline-3,3-diyl)bis(ethan-1-one) (3b)**

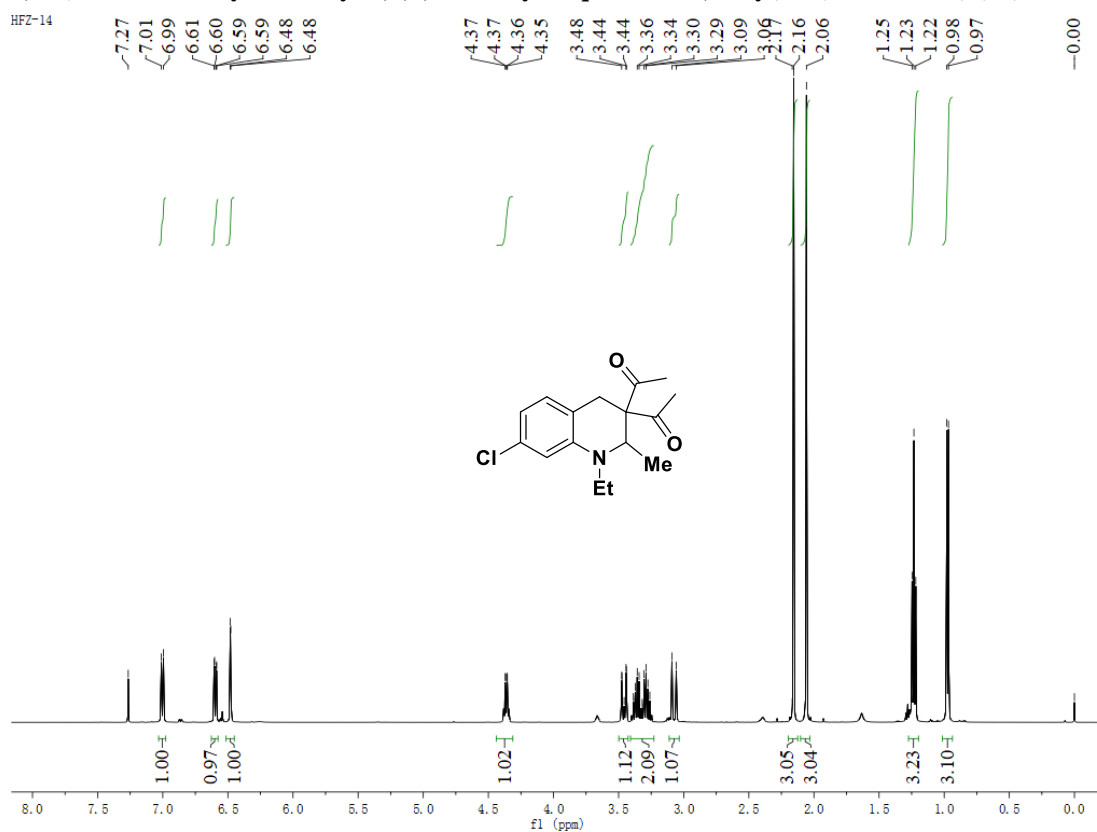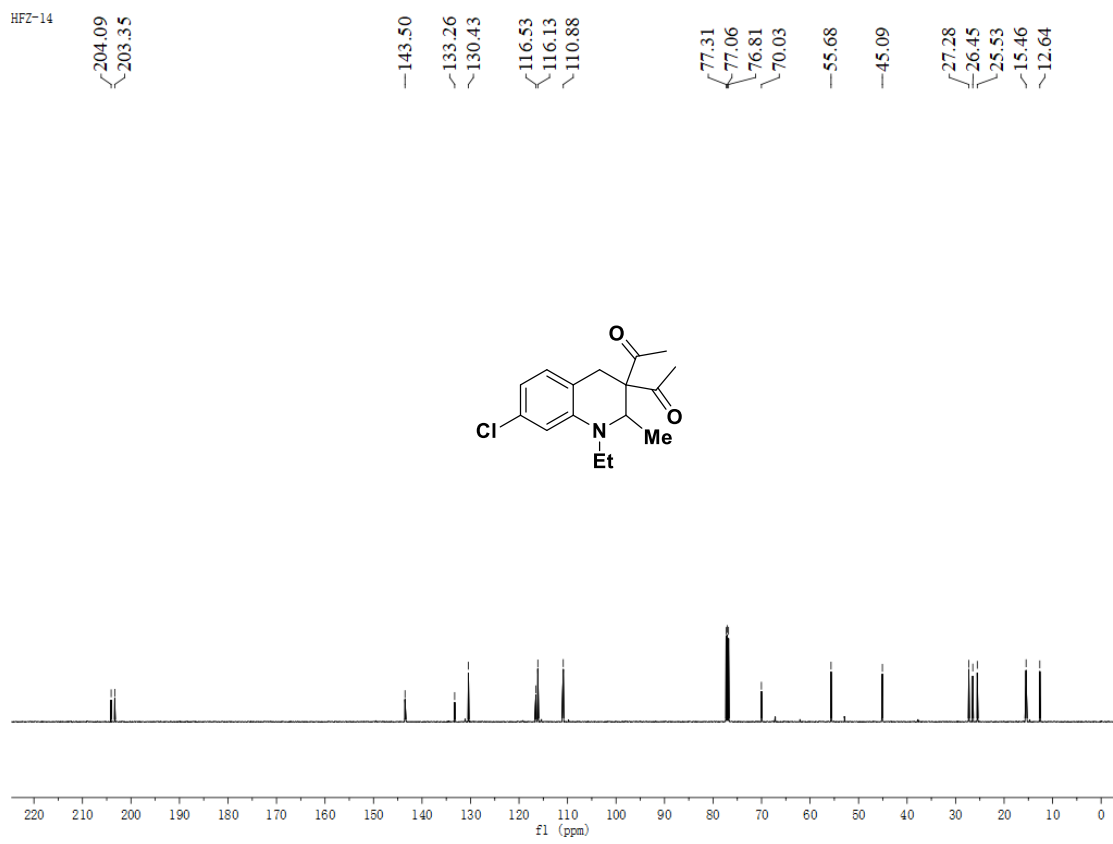

**1,1'-(5-bromo-1-ethyl-2-methyl-1,2,3,4-tetrahydroquinoline-3,3-diyl)bis(ethan-1-one) (3c)**

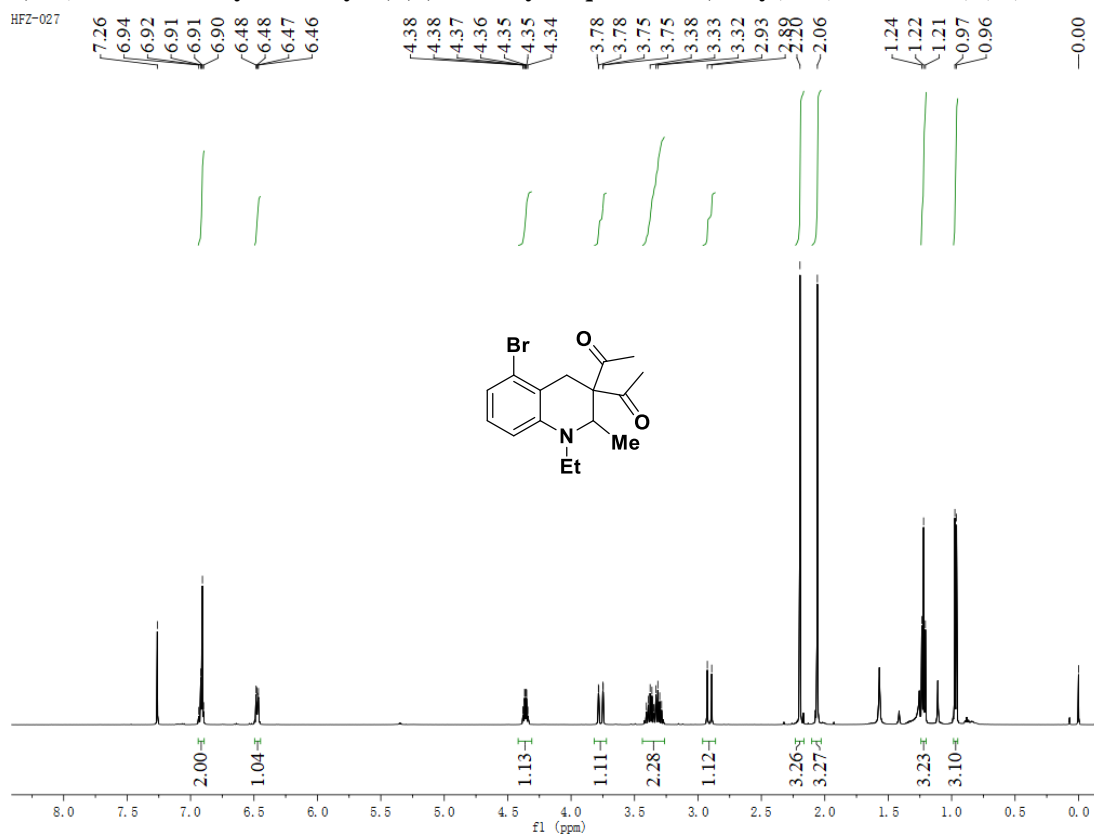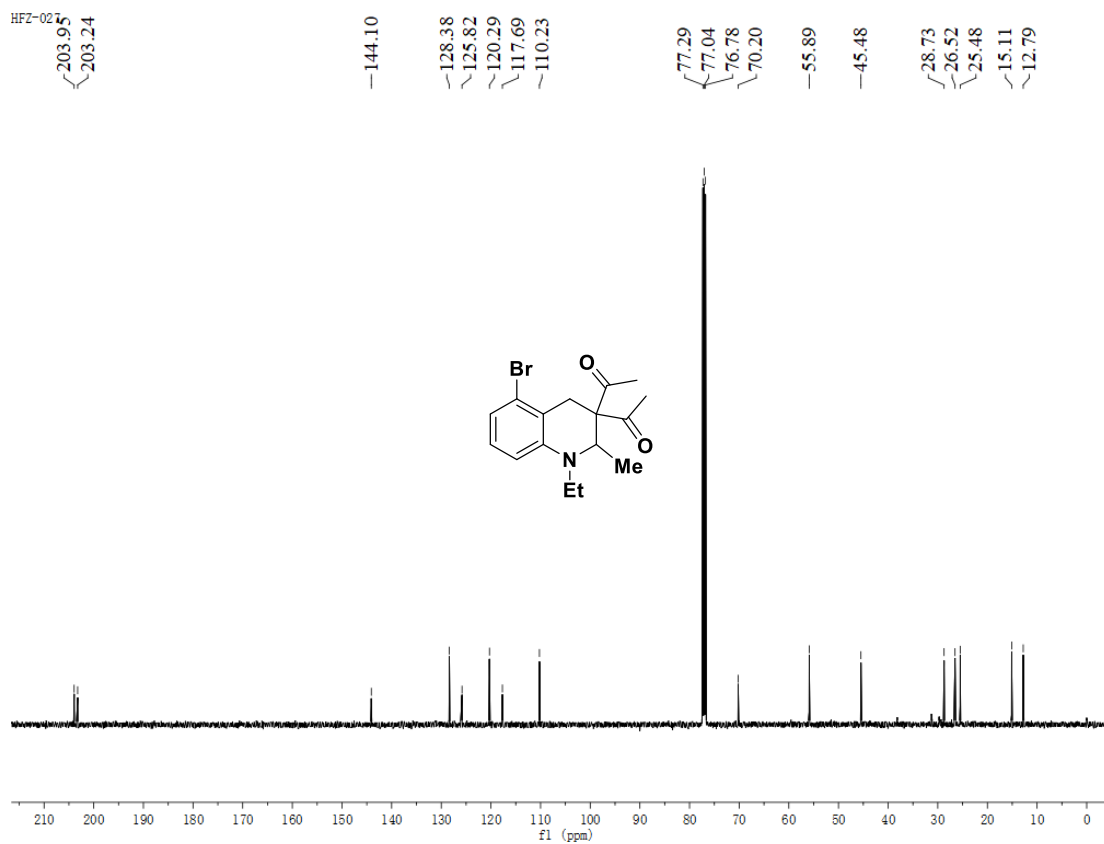

**1,1'-(1-methyl-1,2,3,4-tetrahydroquinoline-3,3-diyl)bis(ethan-1-one) (3d)**

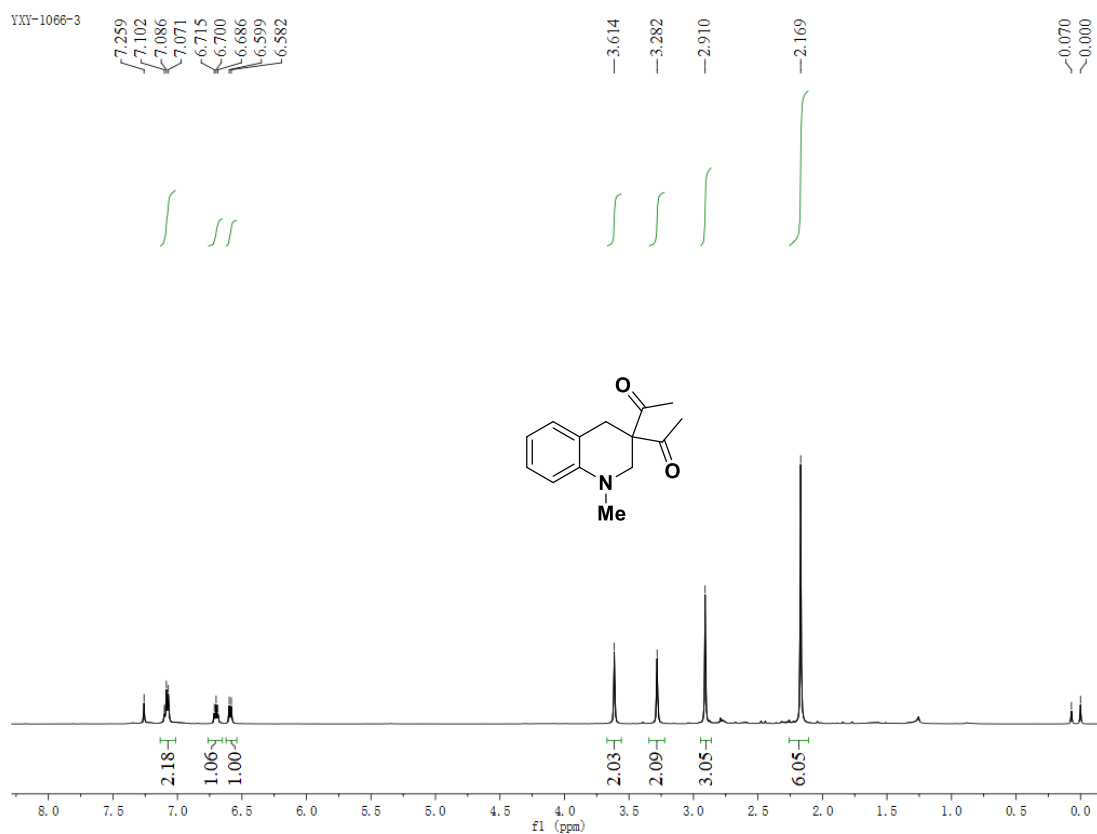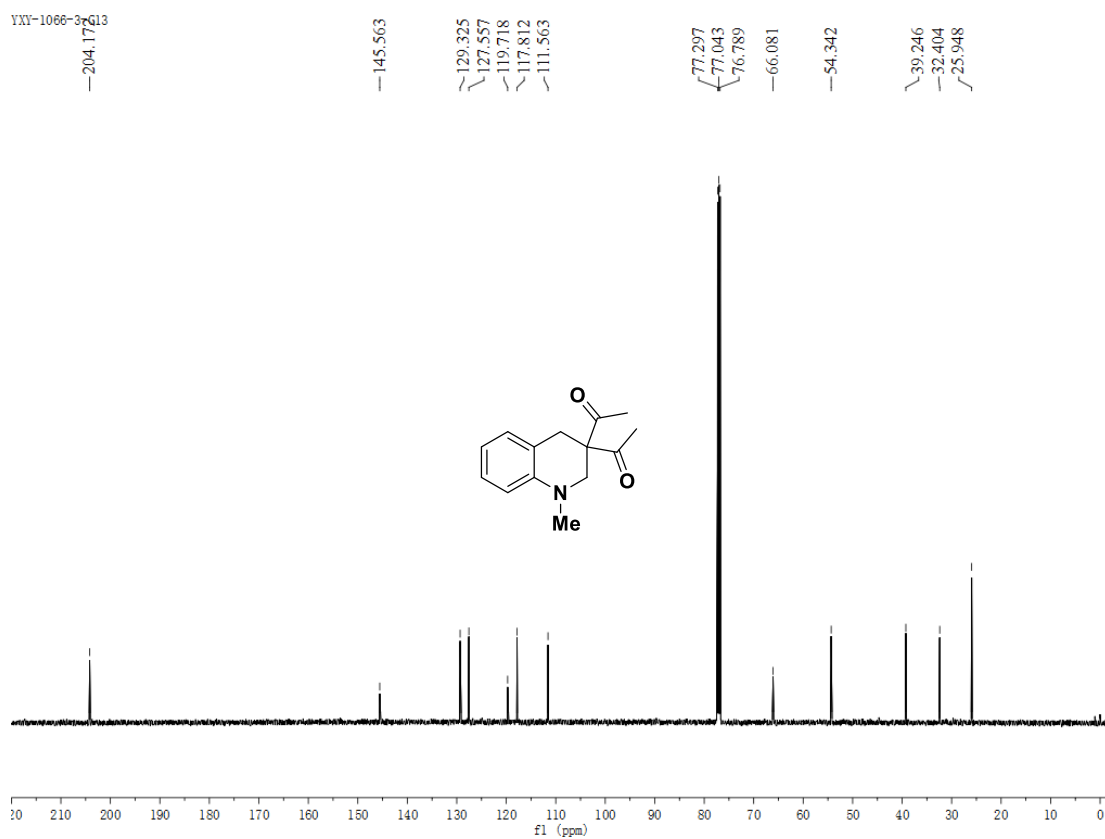

**1,1'-(5-chloro-1-methyl-1,2,3,4-tetrahydroquinoline-3,3-diyl)bis(ethan-1-one) (3e)**

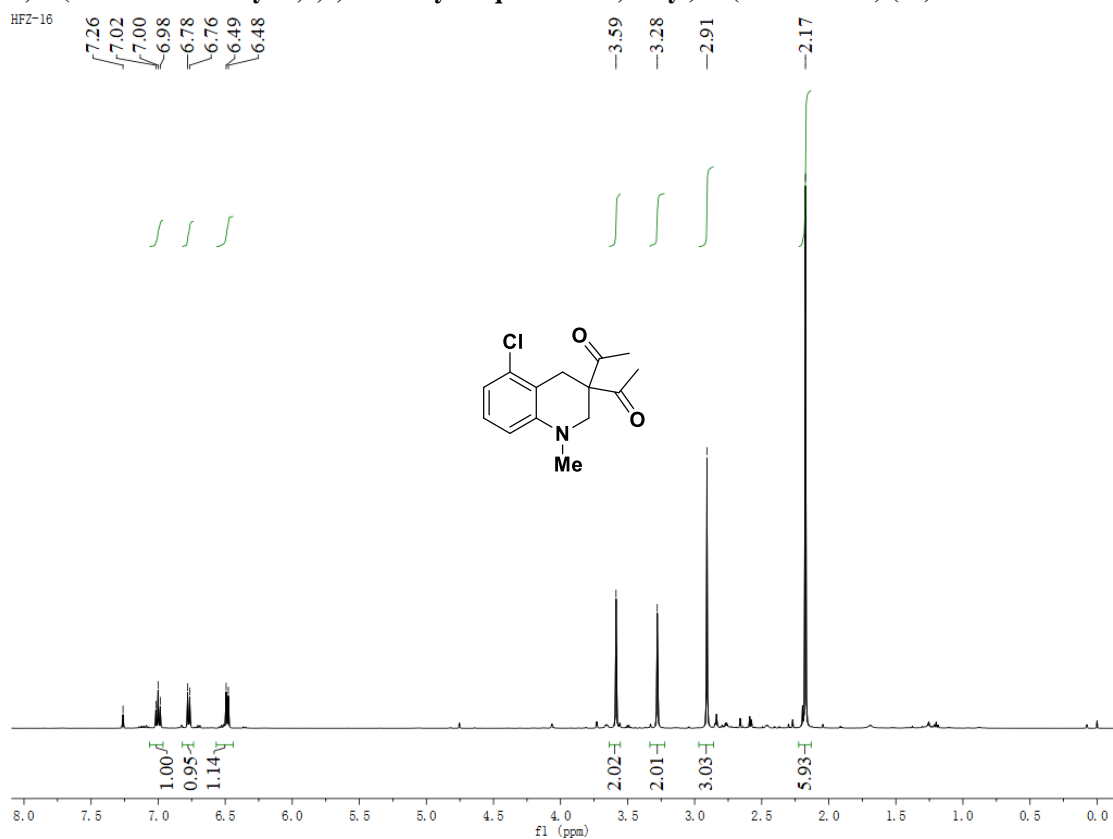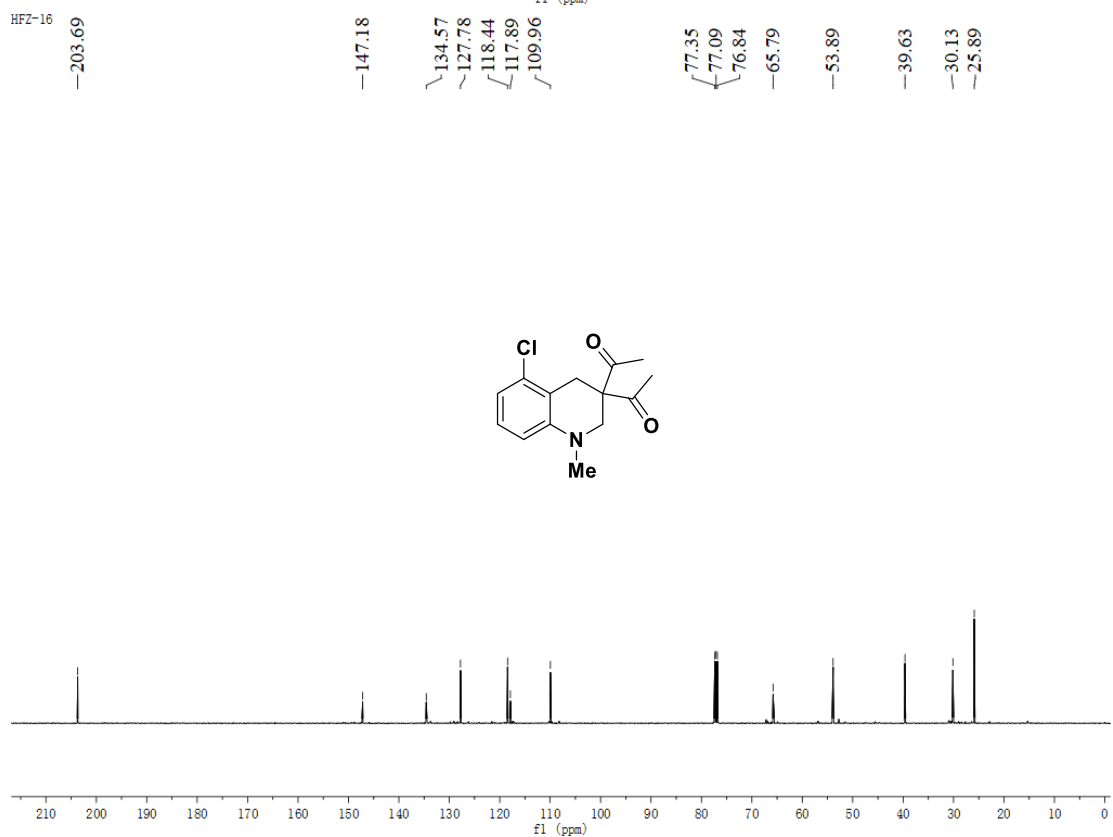



1,1'-(1,2,3,3a,4,5-hexahydropyrrolo[1,2-a]quinoline-4,4-diyl)bis(ethan-1-one) (3f)

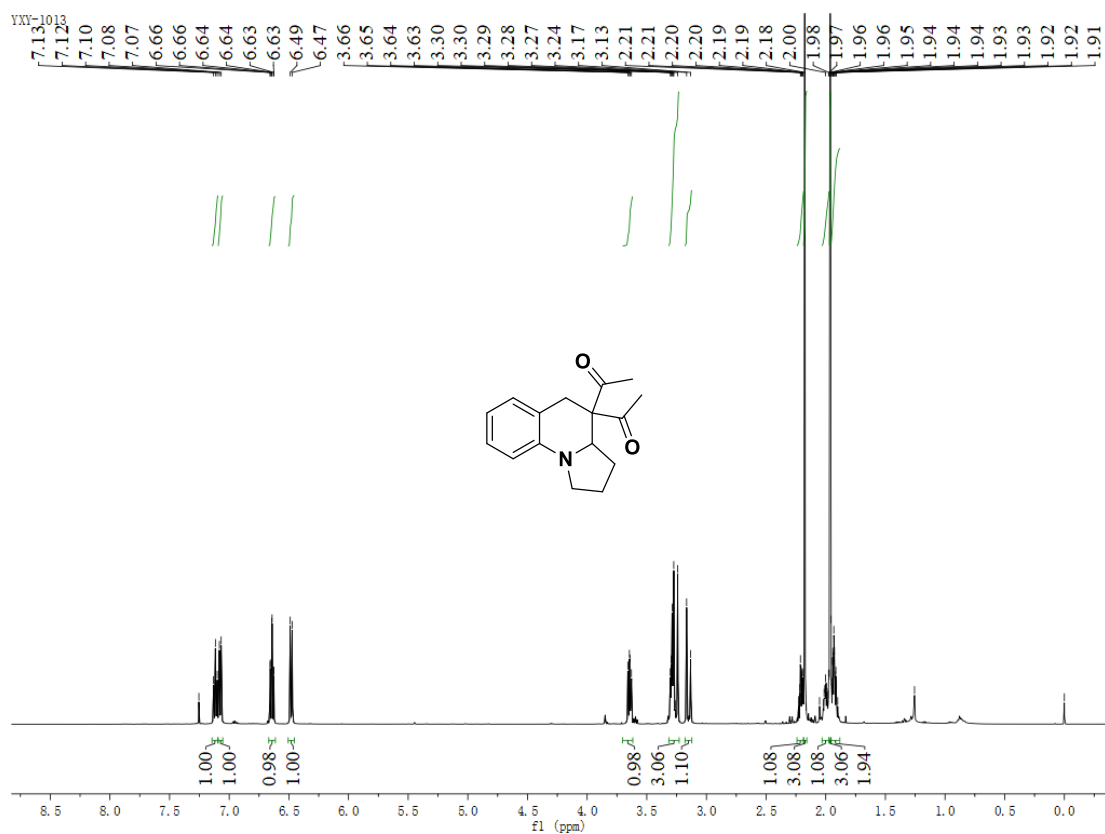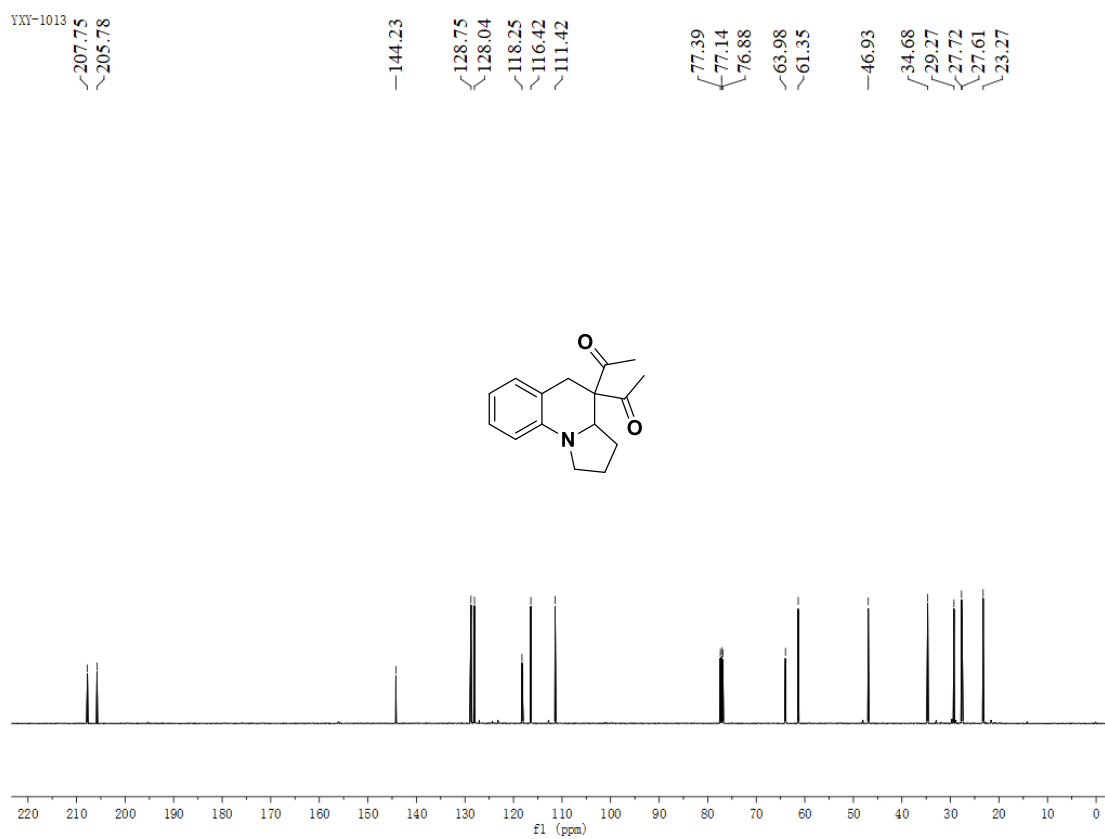

**1,1'-5,6,6a,6b,7,8,9,10,10a,11-decahydroisoindolo[2,1-a]quinoline-6,6-diy1)bis(ethan-1-one)**

**(3g)**

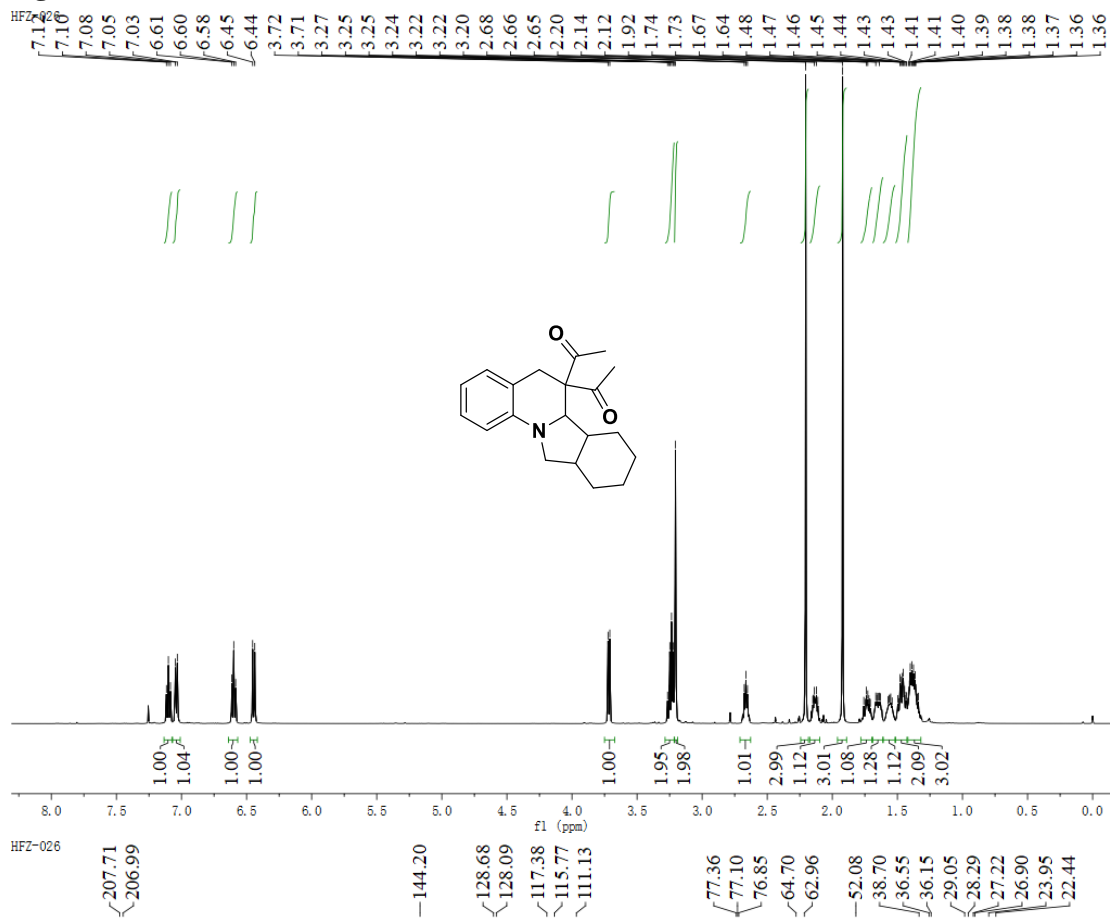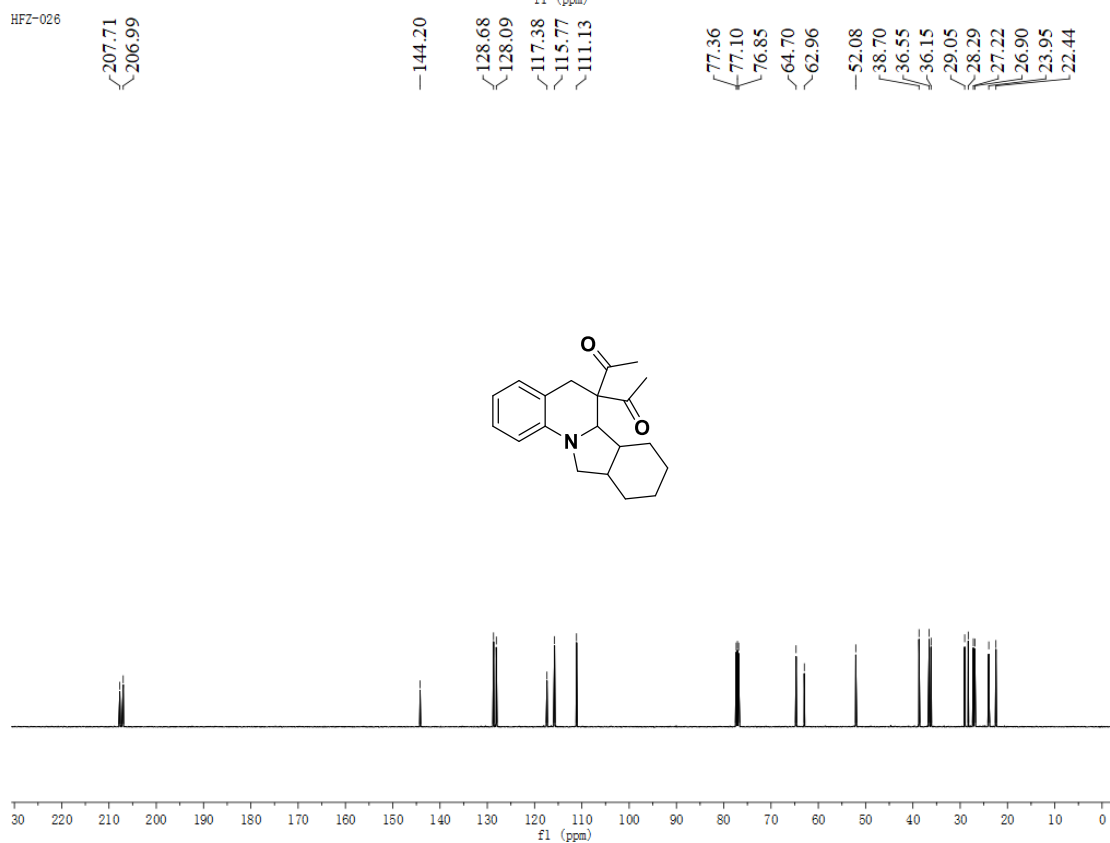

**1,1'-(2,3,4,4a,5,6-hexahydro-1H-pyrido[1,2-a]quinoline-5,5'-diyl)bis(ethan-1-one) (3h)**

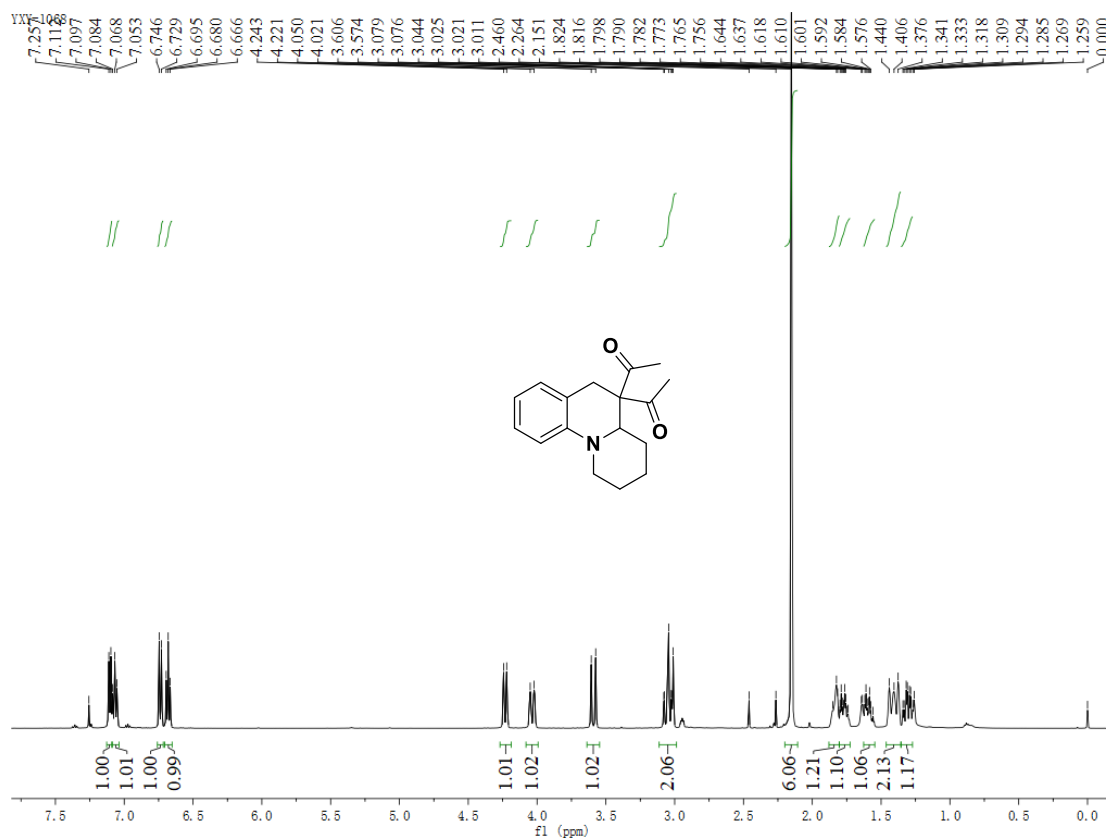

XY-1068-C13

204.618  
203.716

143.366

129.957  
127.716  
120.331  
117.577  
113.080

77.341  
77.087  
76.833  
69.898  
60.265

49.313

28.564  
26.674  
25.706  
24.923  
24.828  
21.784

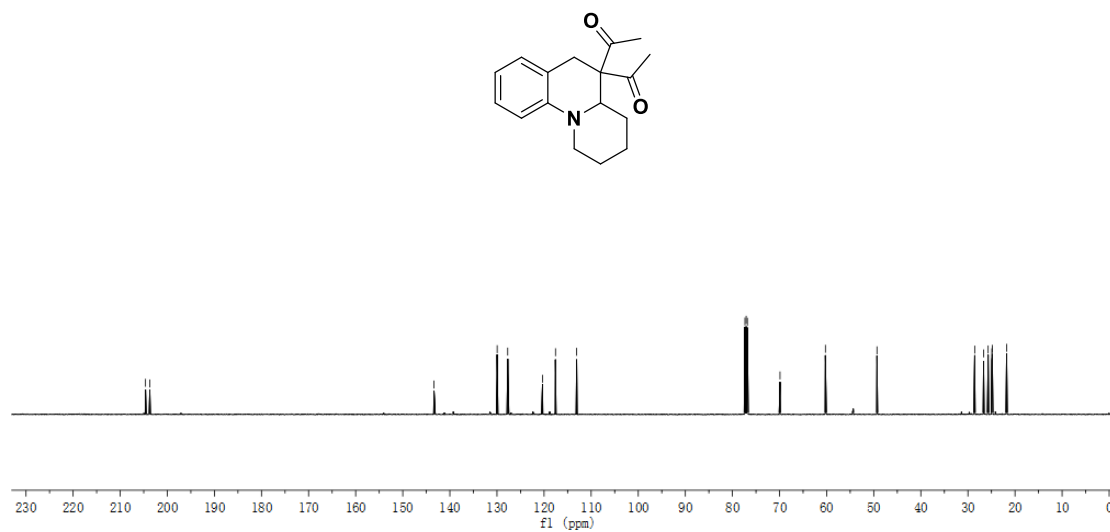

**1,1'-(7,11b,12,13-tetrahydro-6H-isoquinolino[2,1-a]quinoline-12,12-diy)bis(ethan-1-one) (3i)**

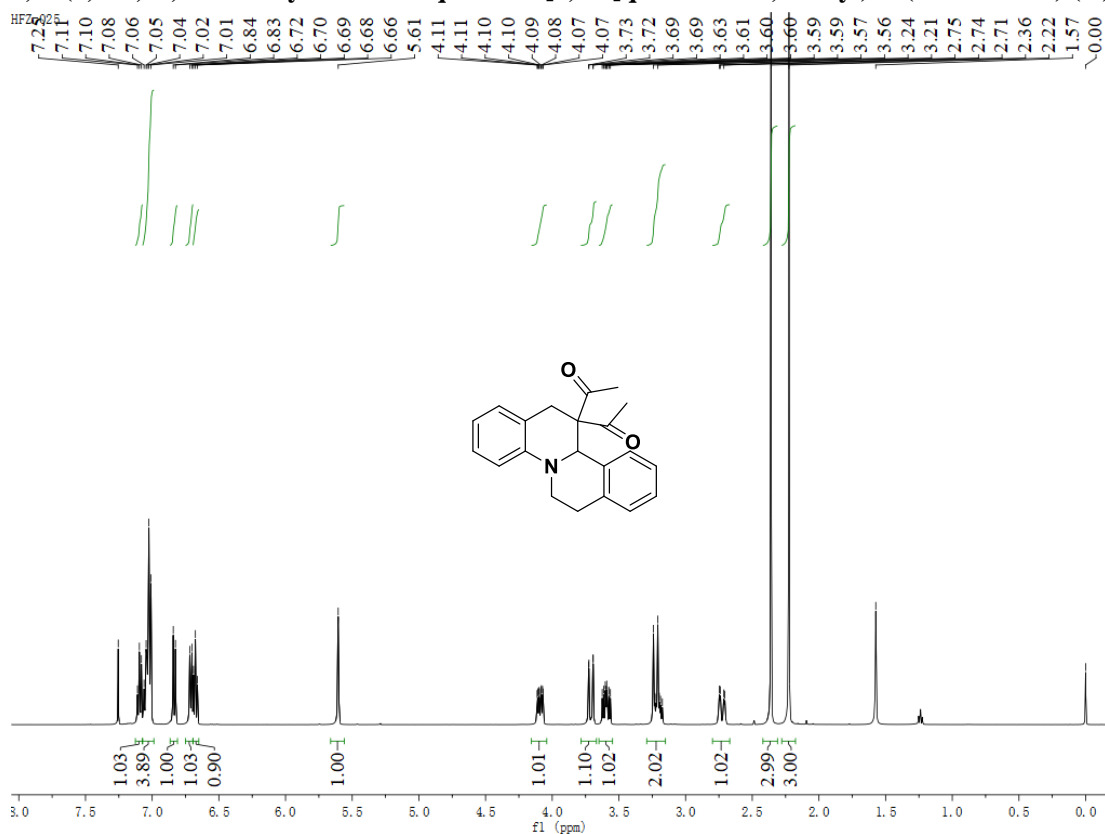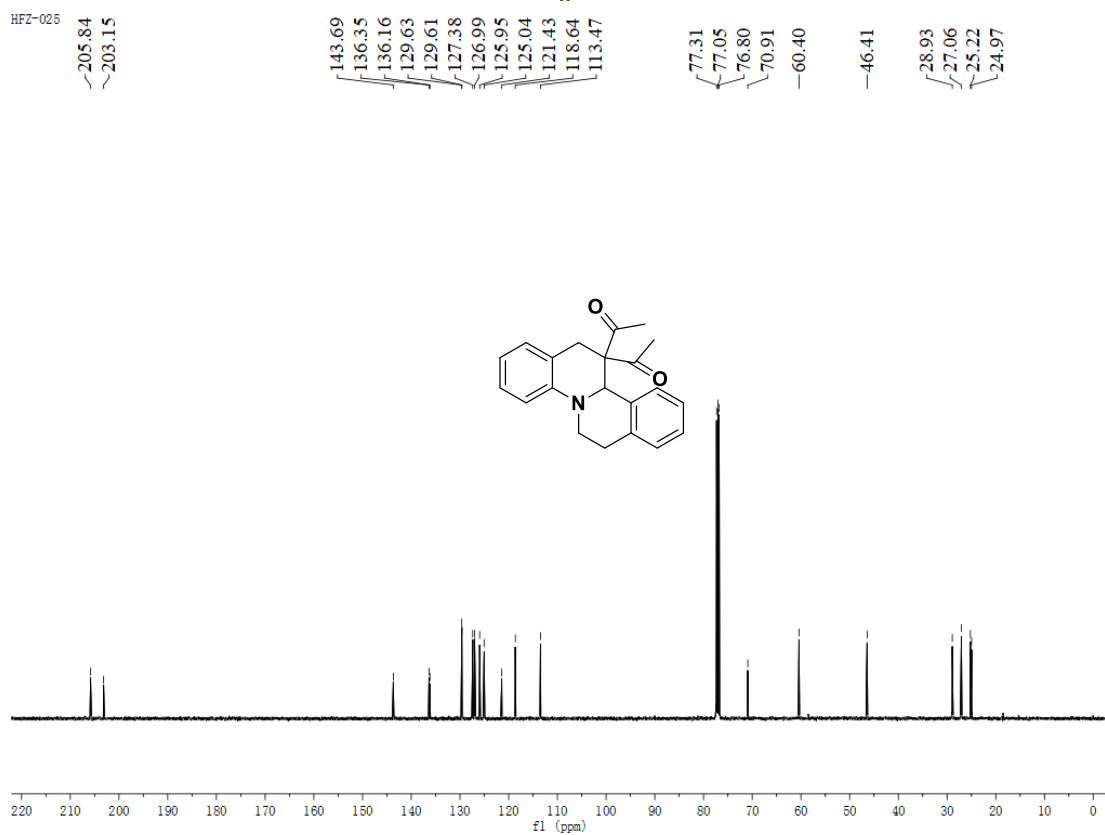

**1,1'-(5,6,6a,7,8,9,10,11-octahydroazepino[1,2-a]quinoline-6,6-diy)bis(ethan-1-one) (3j)**

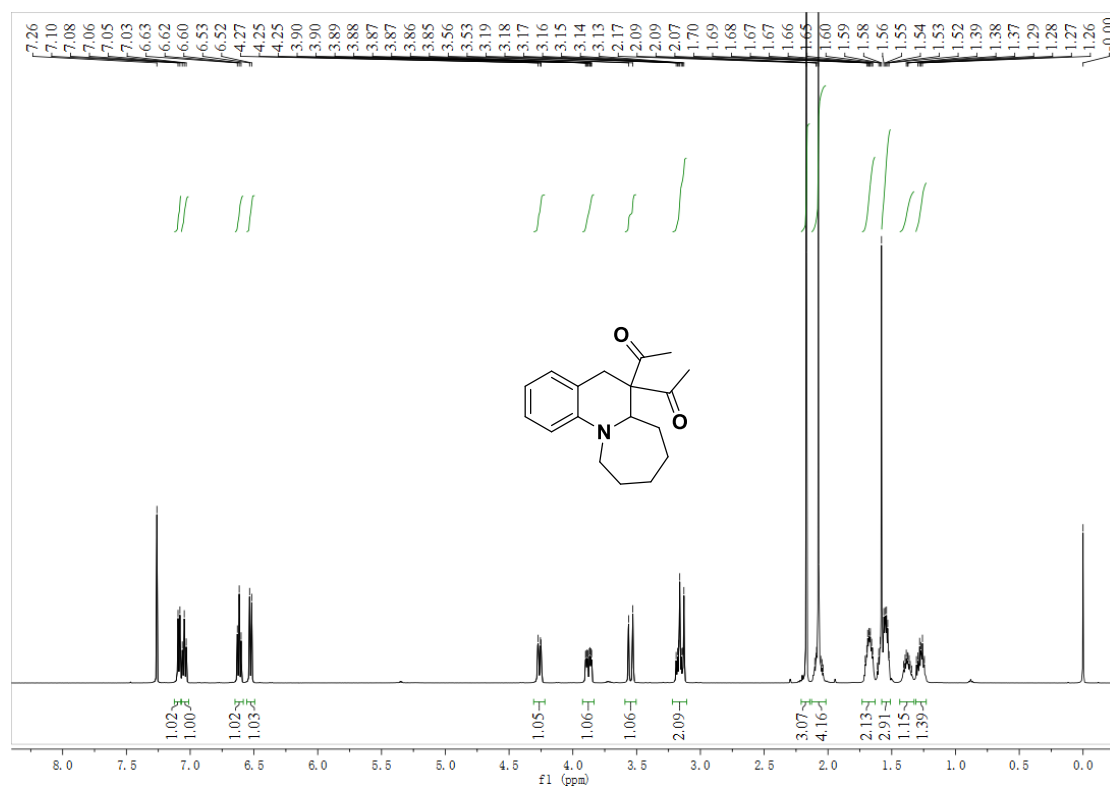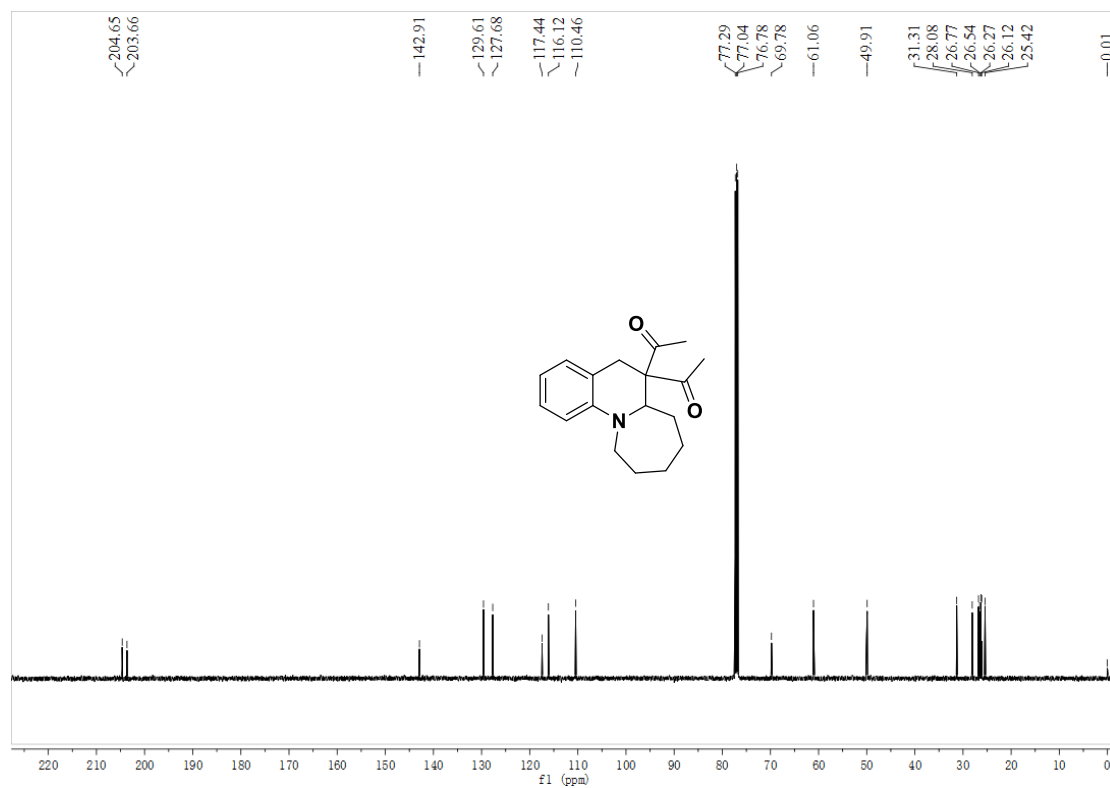

**ethyl 3-acetyl-1-ethyl-2-methyl-1,2,3,4-tetrahydroquinoline-3-carboxylate (3k)**

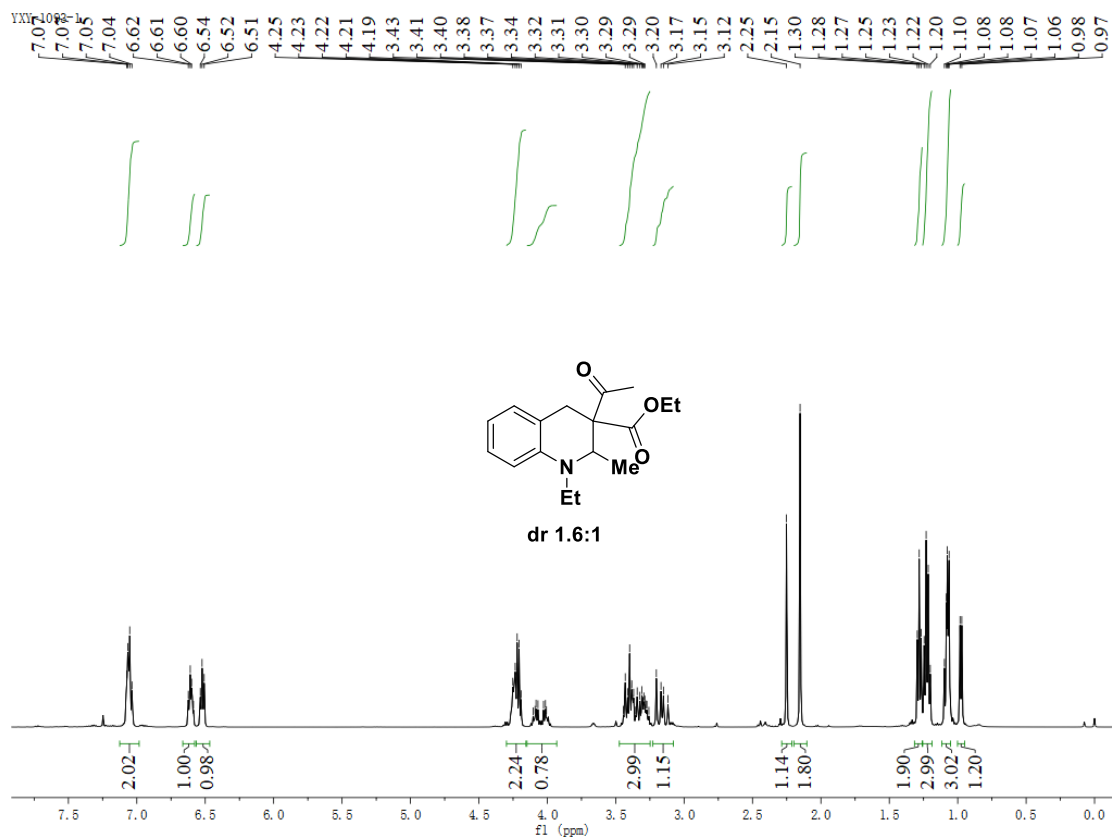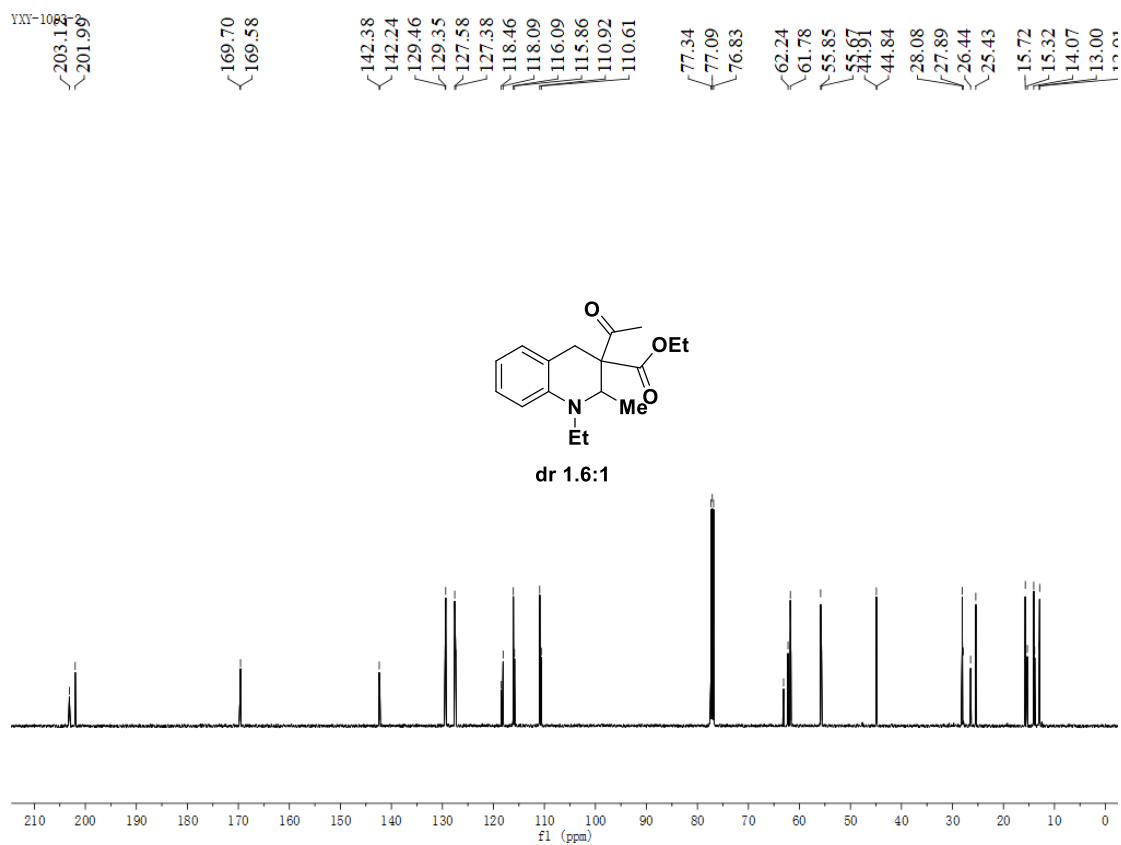

ethyl 6-acetyl-5,6,6a,7,8,9,10,11-octahydroazepino[1,2-a]quinoline-6-carboxylate (3l)

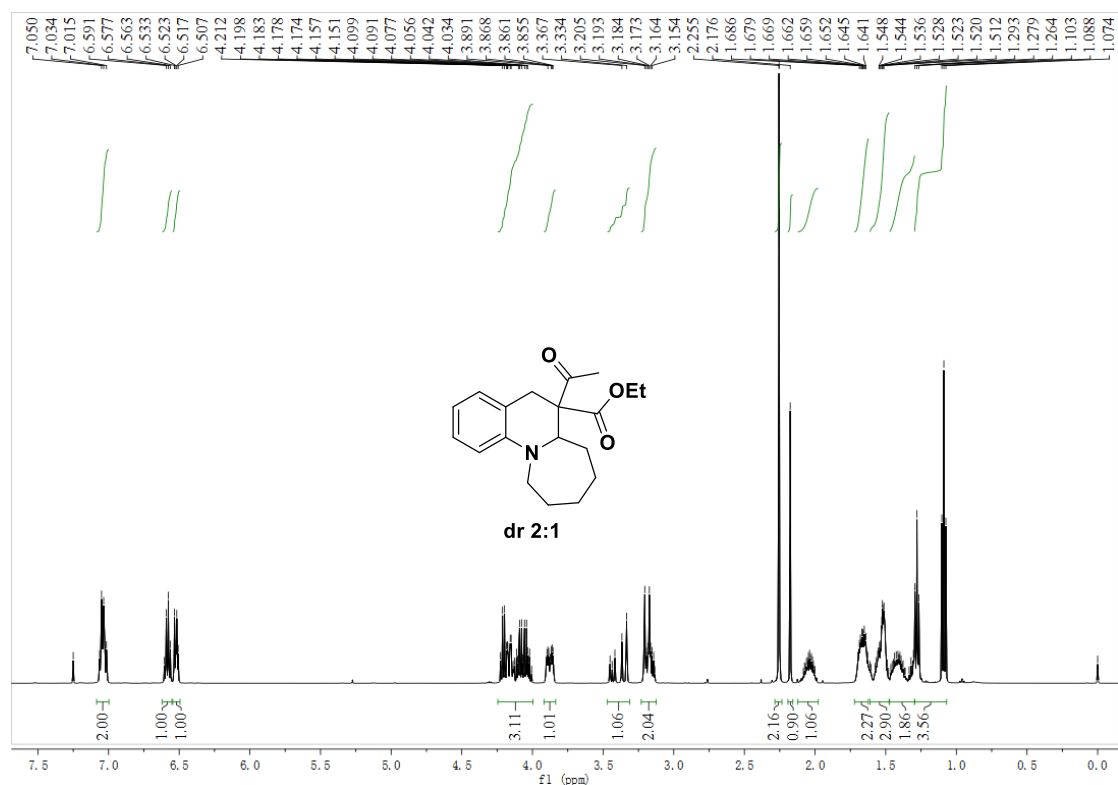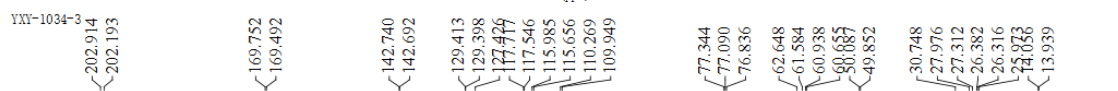

ethyl 6-(2,2,2-trifluoroacetyl)-5,6,6a,7,8,9,10,11-octahydroazepino[1,2-a]quinoline-6-carboxylate  
(3m)

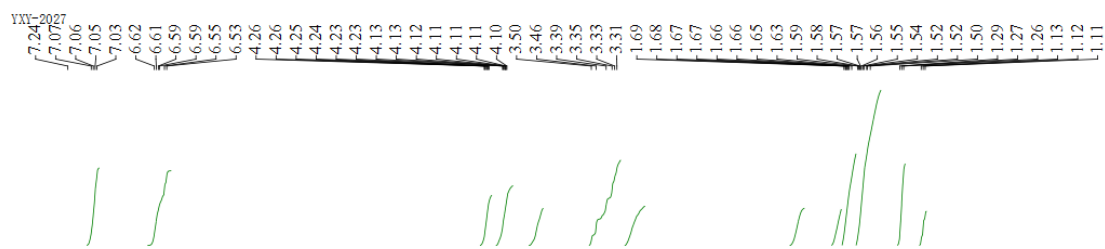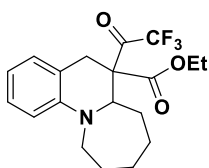

dr 2.3:1

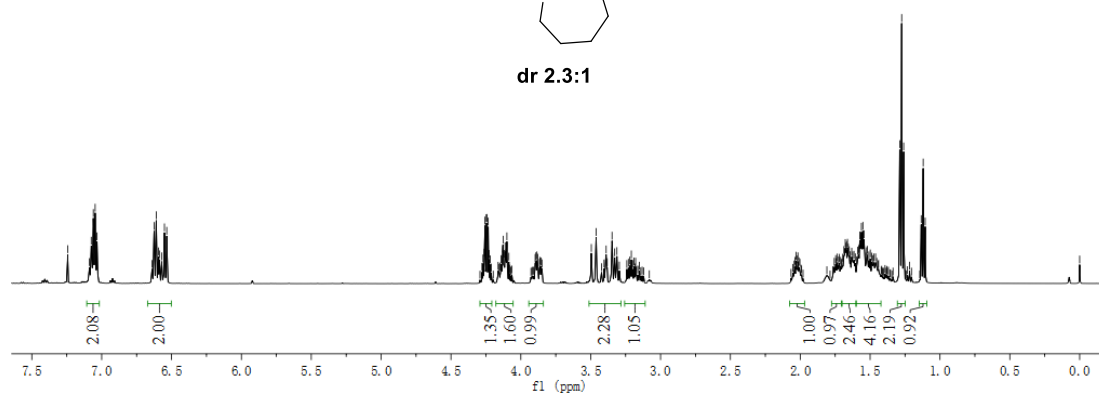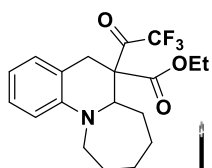

dr 2.3:1

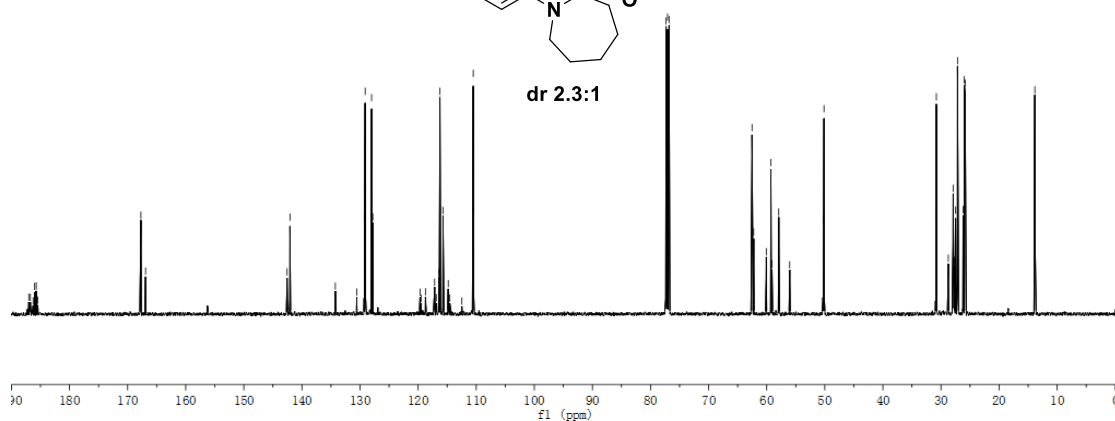



ethyl 6-benzoyl-5,6,6a,7,8,9,10,11-octahydroazepino[1,2-a]quinoline-6-carboxylate (3n)

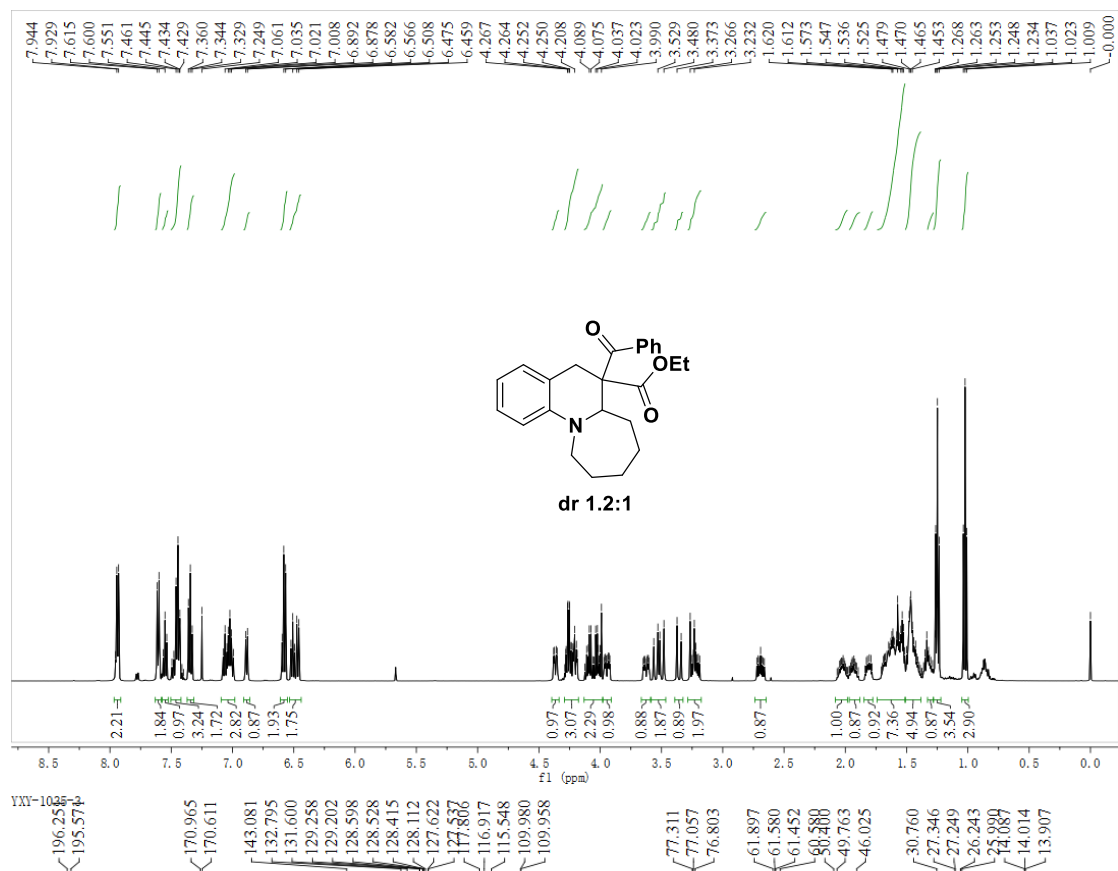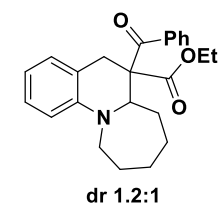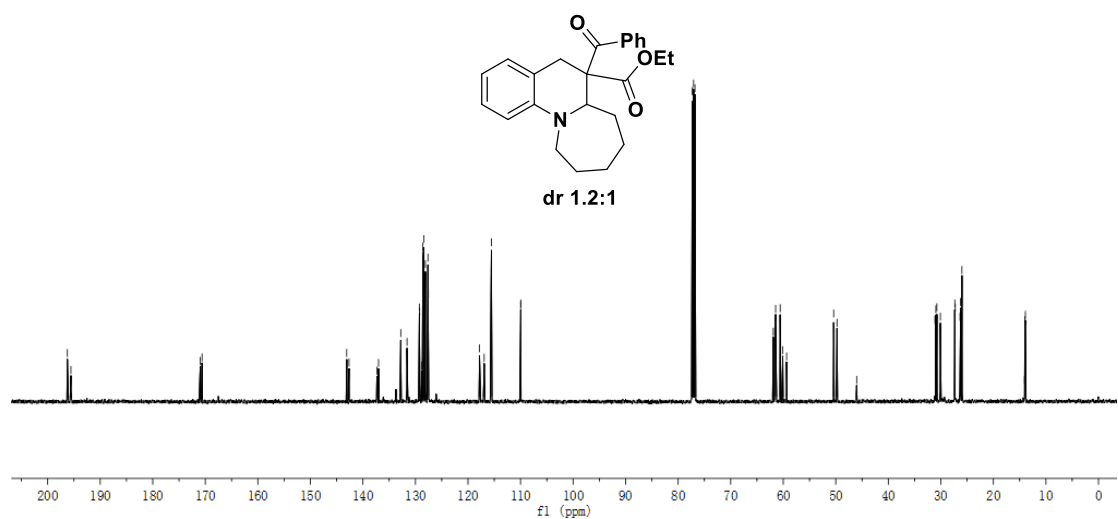

ethyl 6-cyano-5,6,6a,7,8,9,10,11-octahydroazepino[1,2-a]quinoline-6-carboxylate (3o)

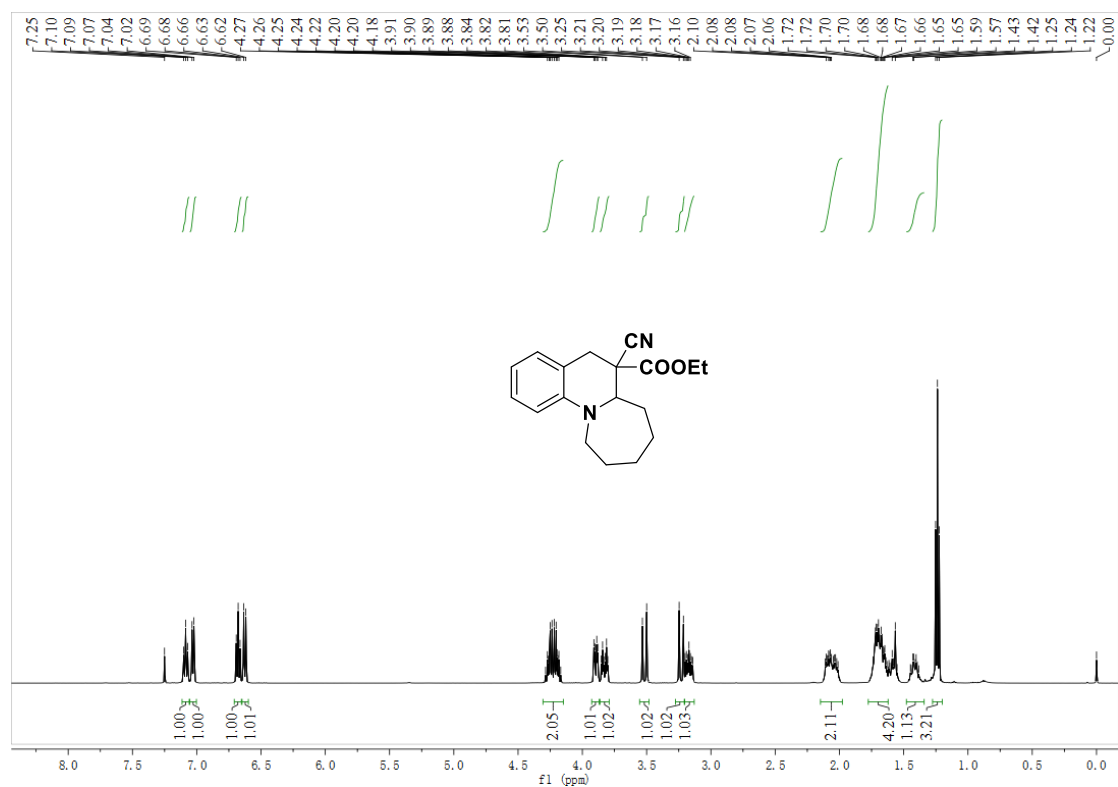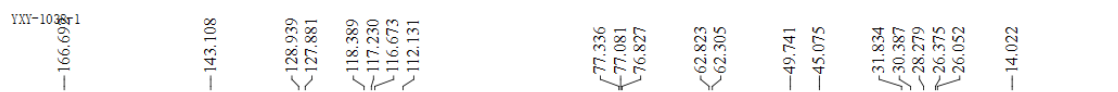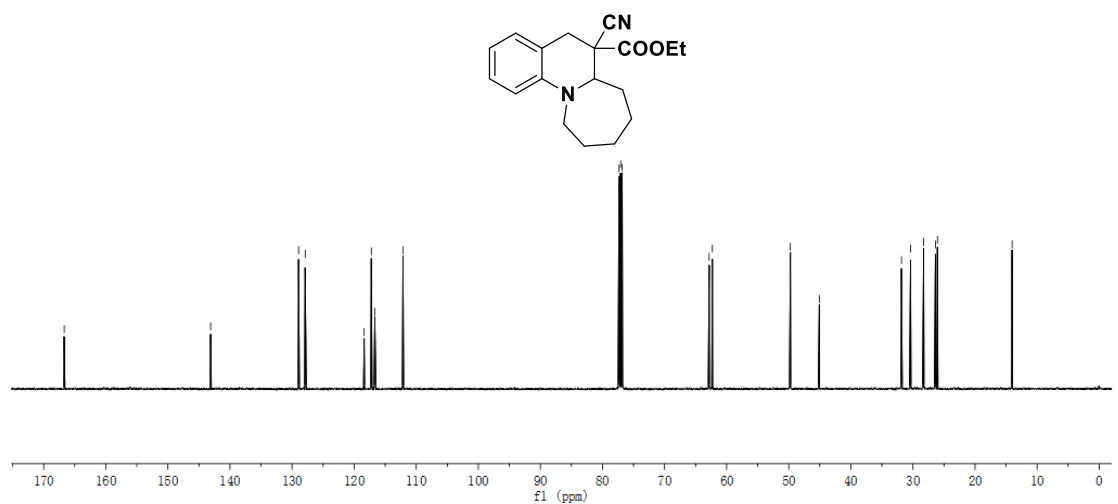

6a,7,8,9,10,11-hexahydroazepino[1,2-a]quinoline-6,6(5H)-dicyanitrile (3p)

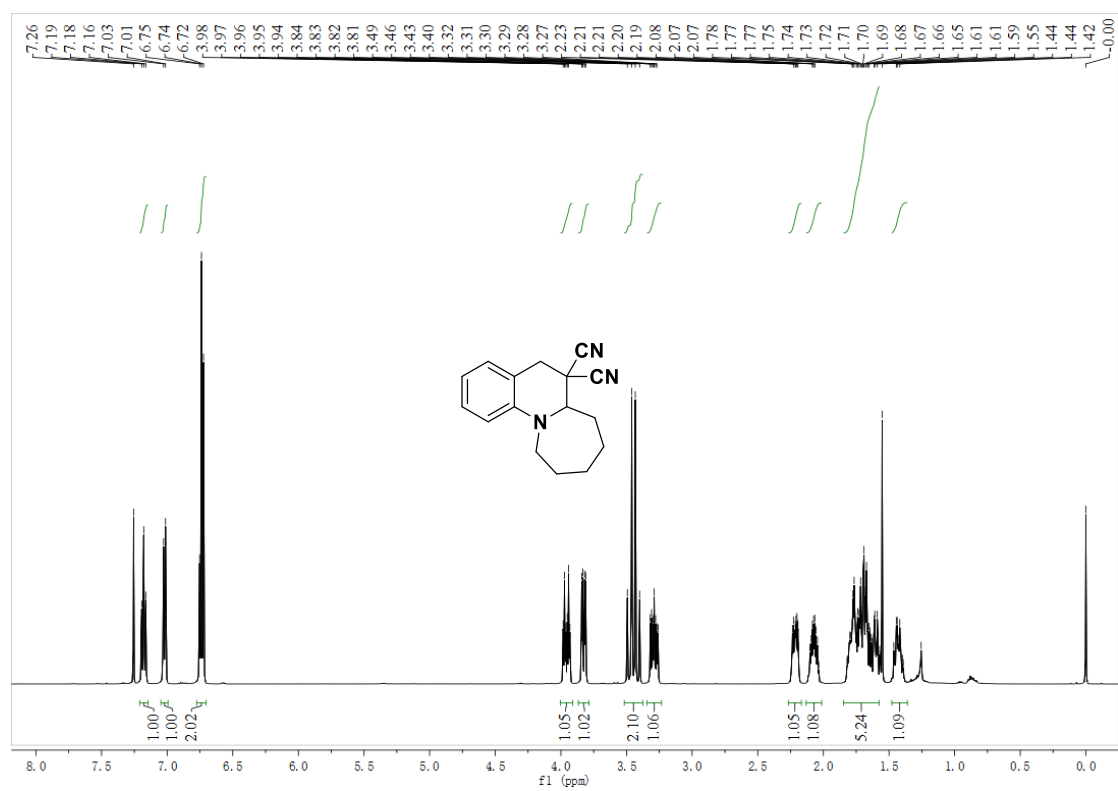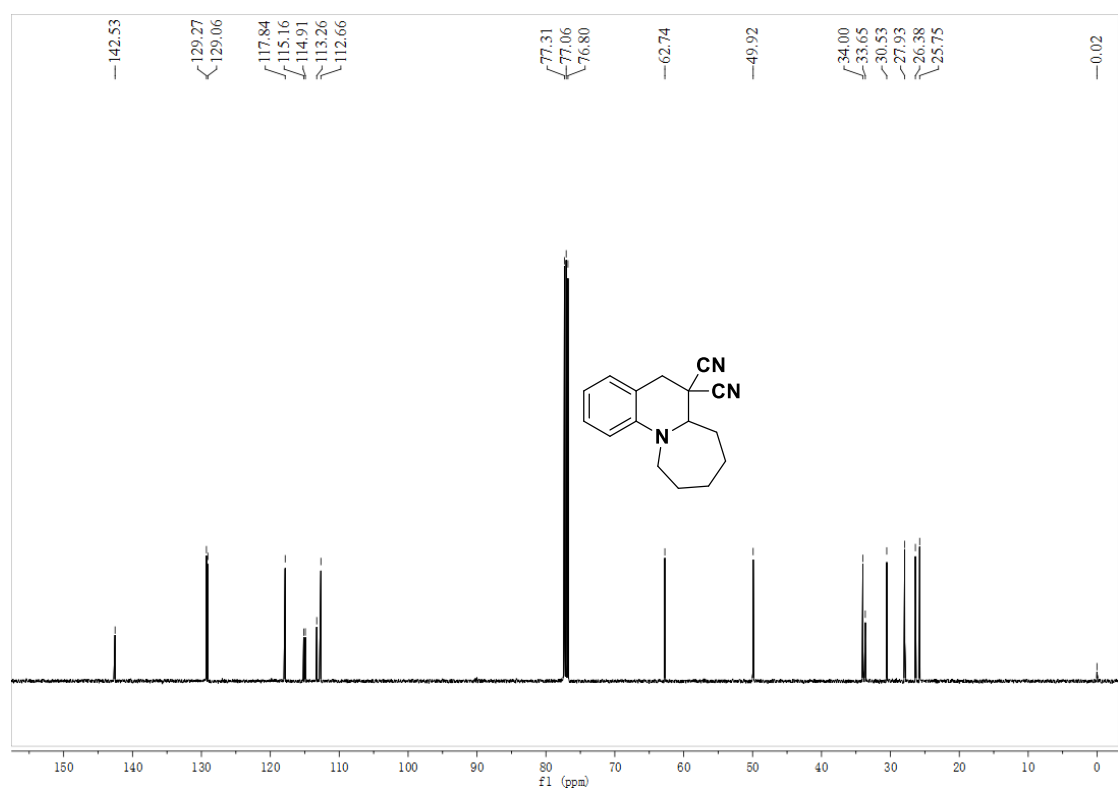

**1,2,3,3a-tetrahydropyrrolo[1,2-a]quinoline-4,4(5H)-dicyanonitrile (3q)**

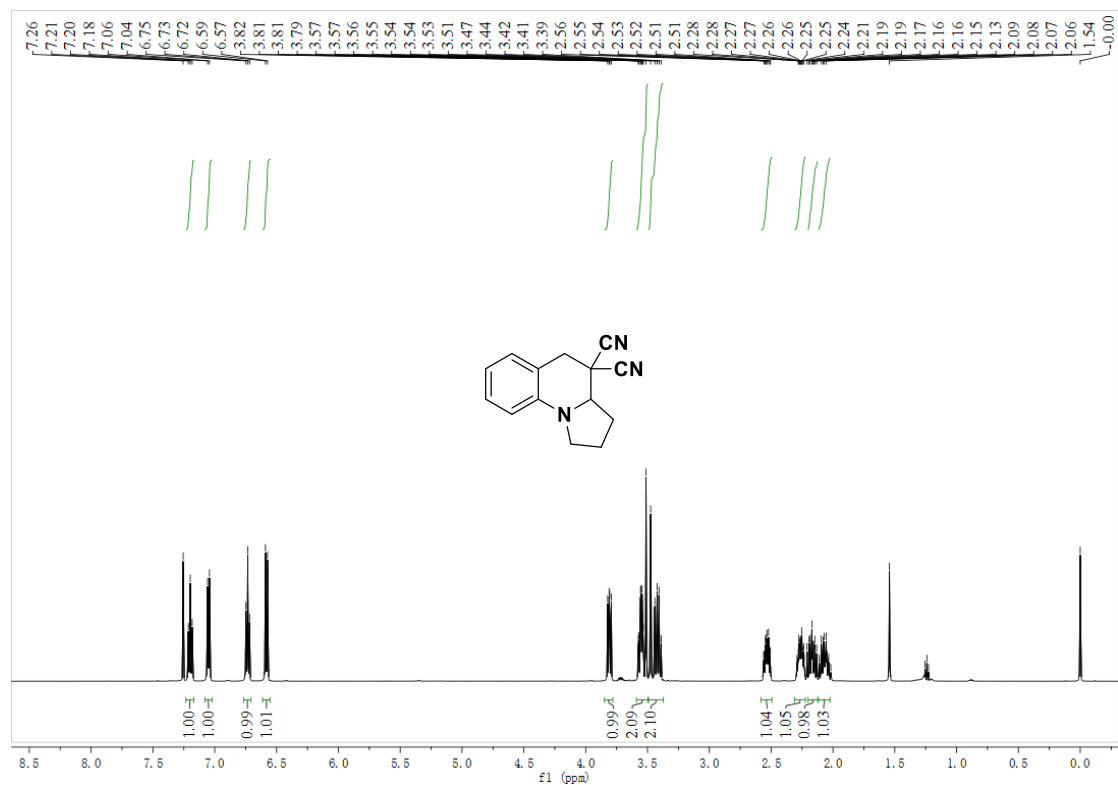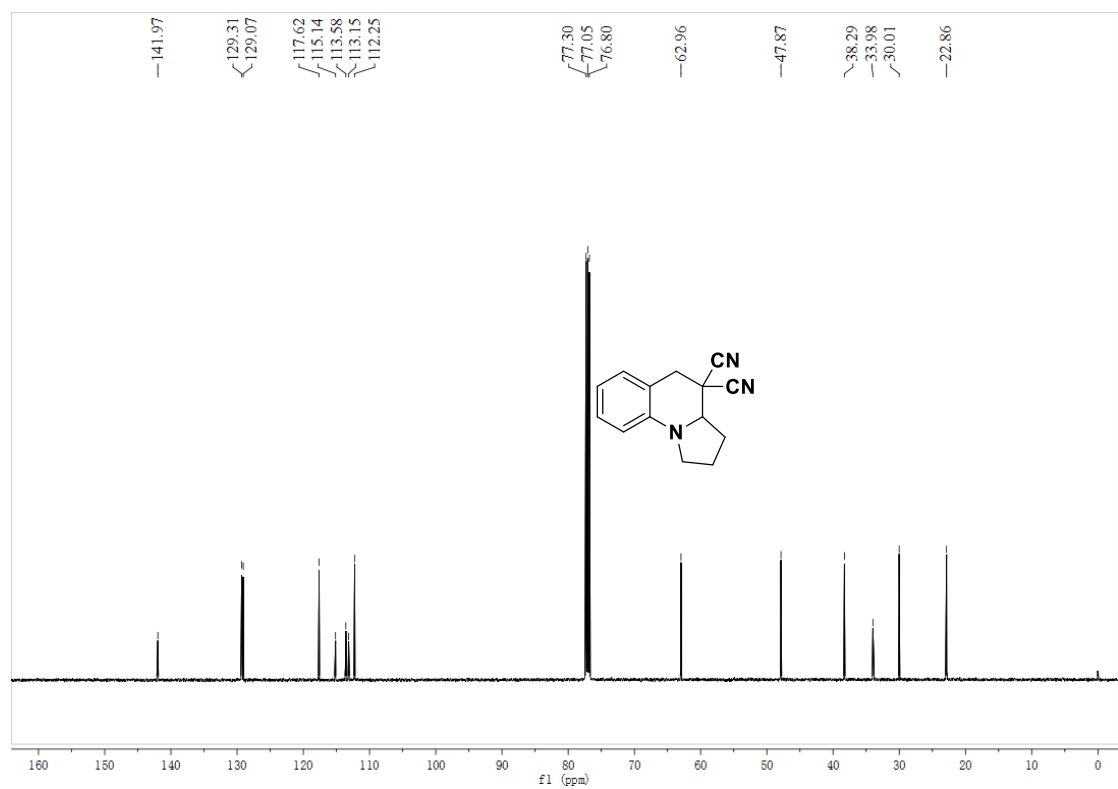

**6a,7,8,9,10,11-hexahydro-5H-spiro[azepino[1,2-a]quinoline-6,1'-cyclopentane]-2',5'-dione (3r)**

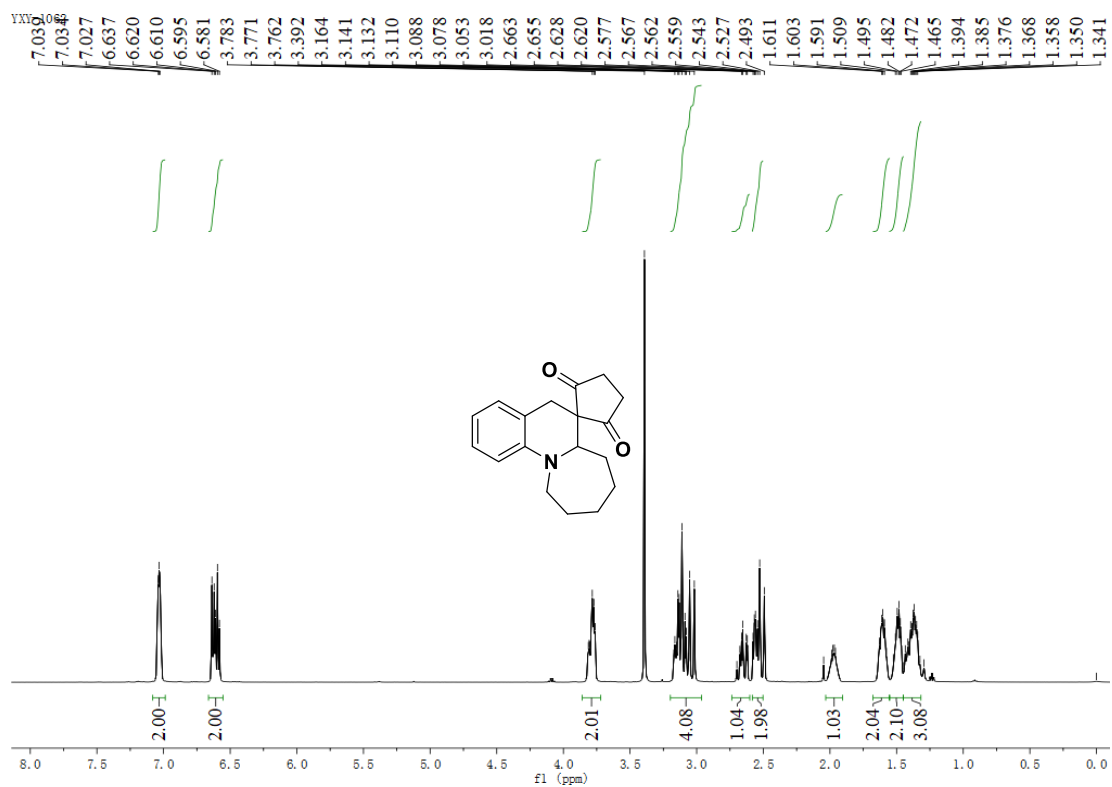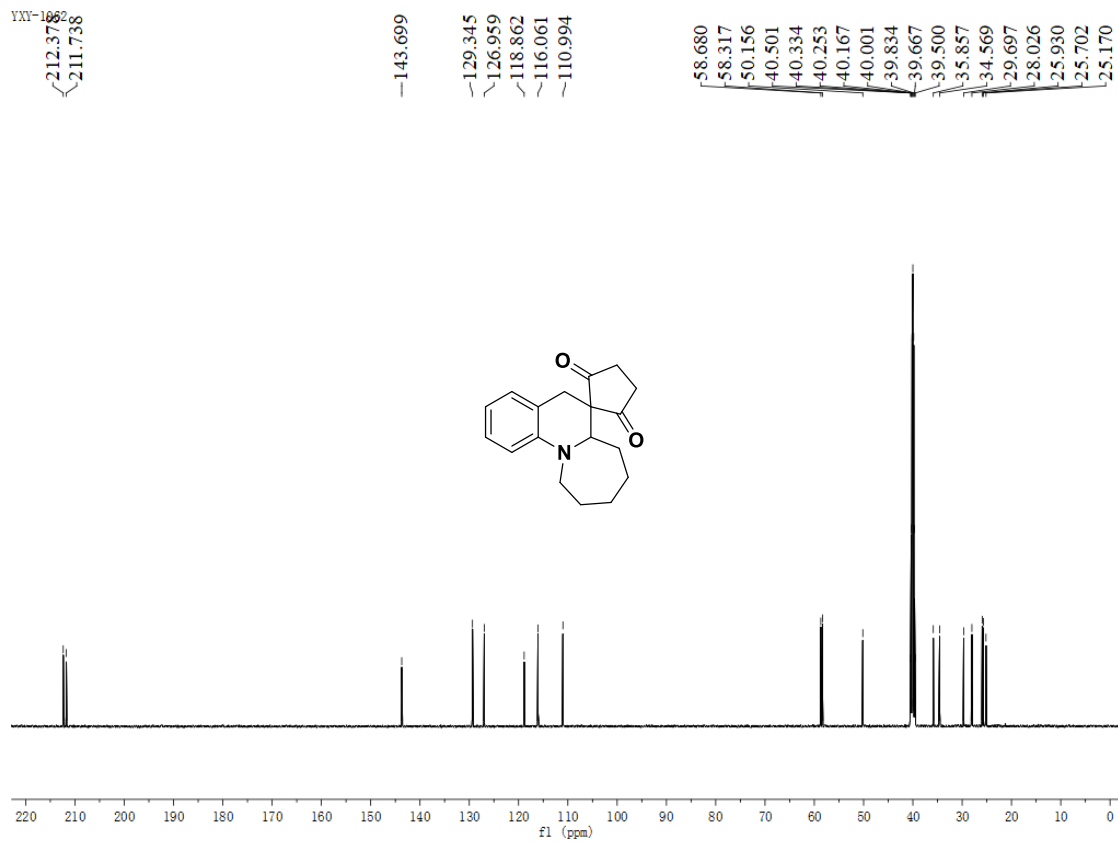

**6a,7,8,9,10,11-hexahydro-5H-spiro[azepino[1,2-a]quinoline-6,1'-cyclohexane]-2',6'-dione (3s)**

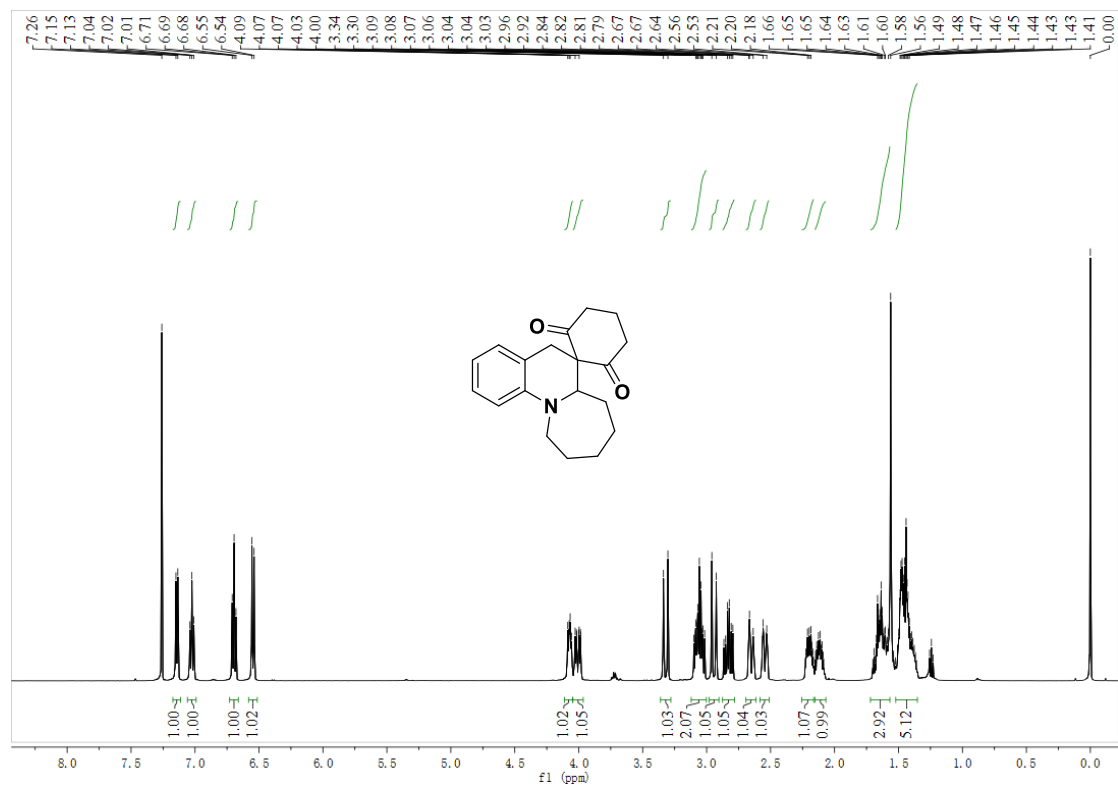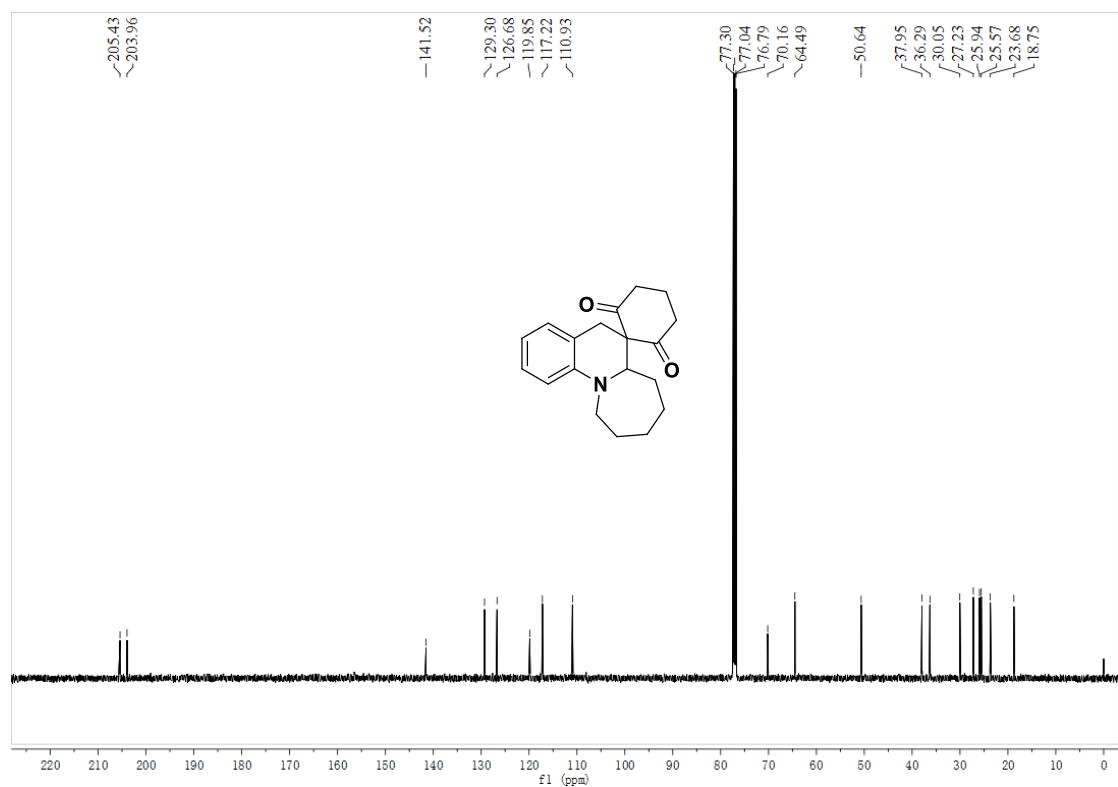

**2',2'-dimethyl-6a,7,8,9,10,11-hexahydro-5H-spiro[azepino[1,2-a]quinoline-6,5'-[1,3]dioxane]-4',6'-dione (3t)**

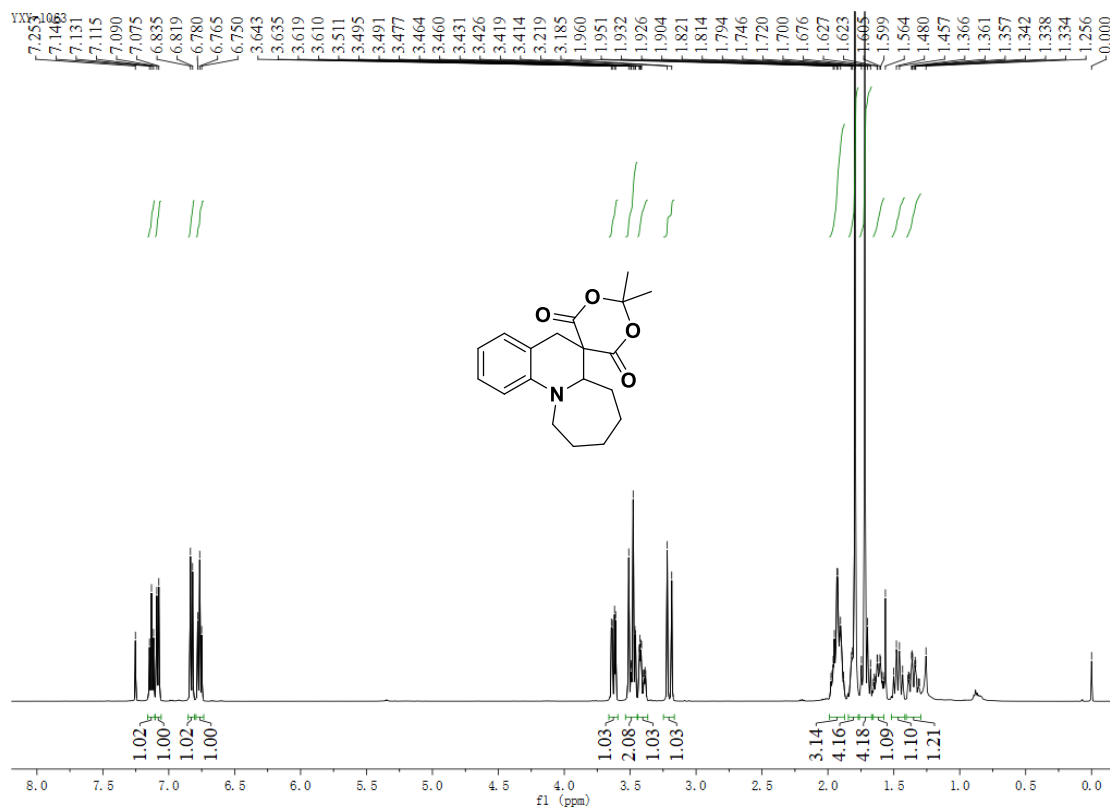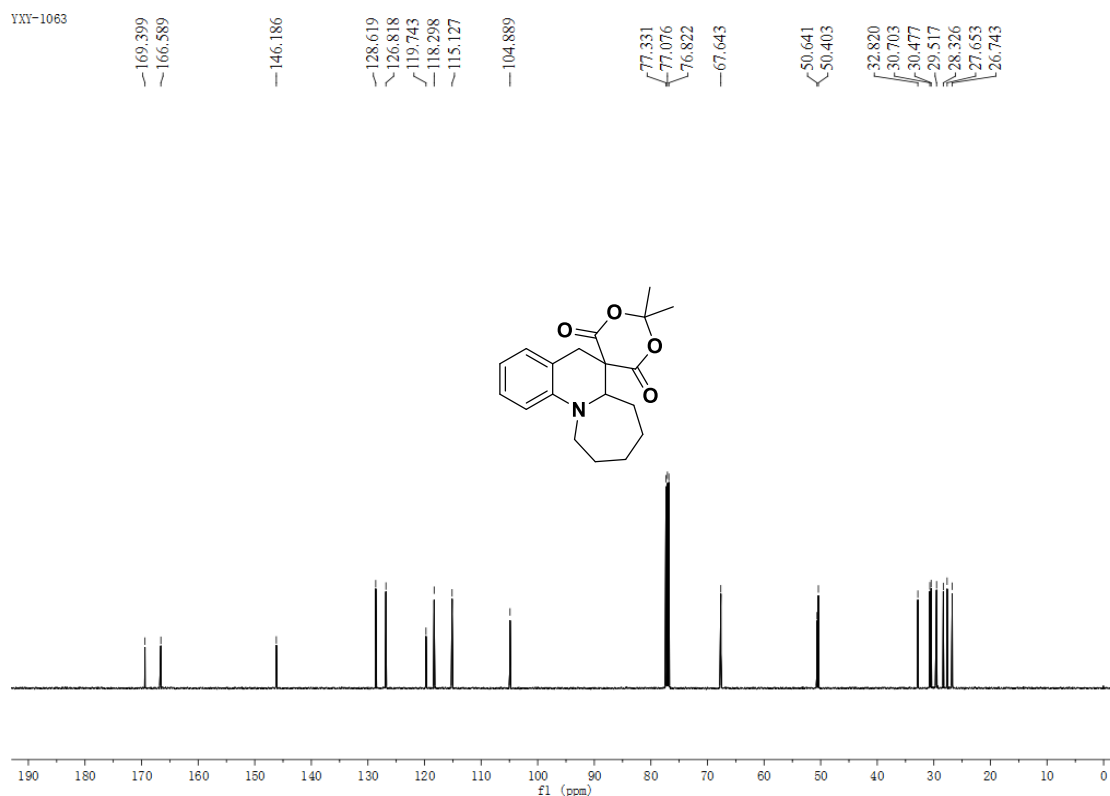

**1',3'-dimethyl-6a,7,8,9,10,11-hexahydro-2'H,5H-spiro[azepino[1,2-a]quinoline-6,5'-pyrimidine]-2',4',6'(1'H,3'H)-trione (3u)**

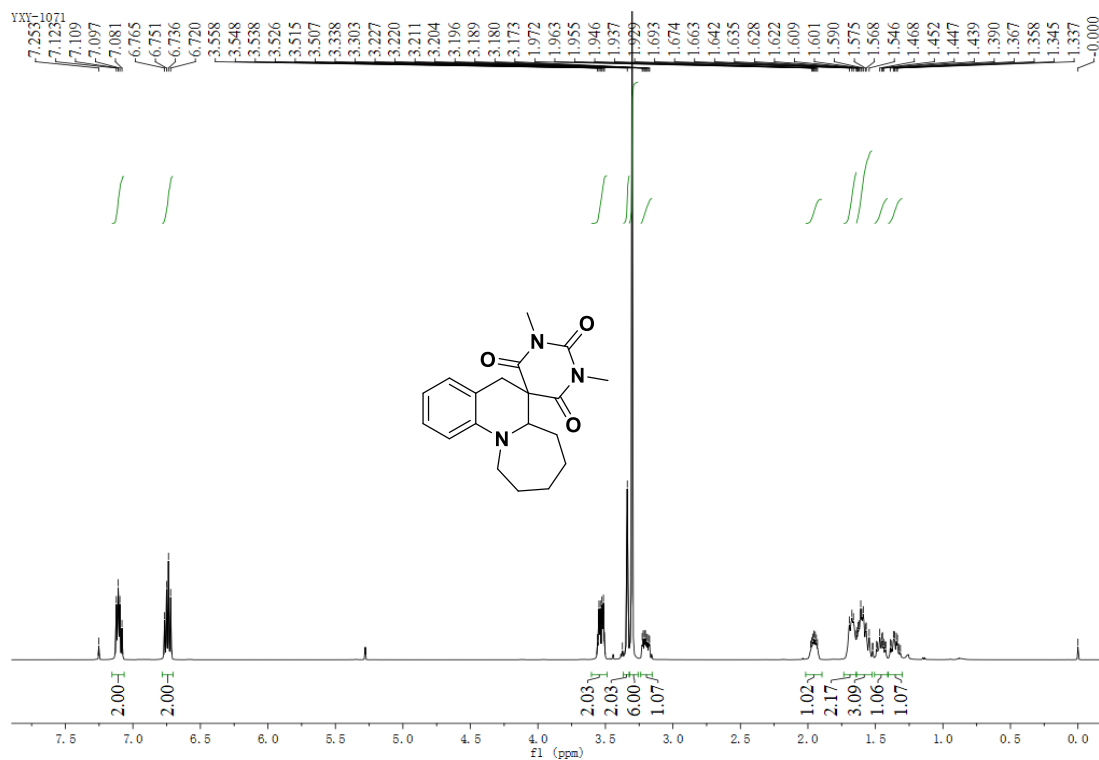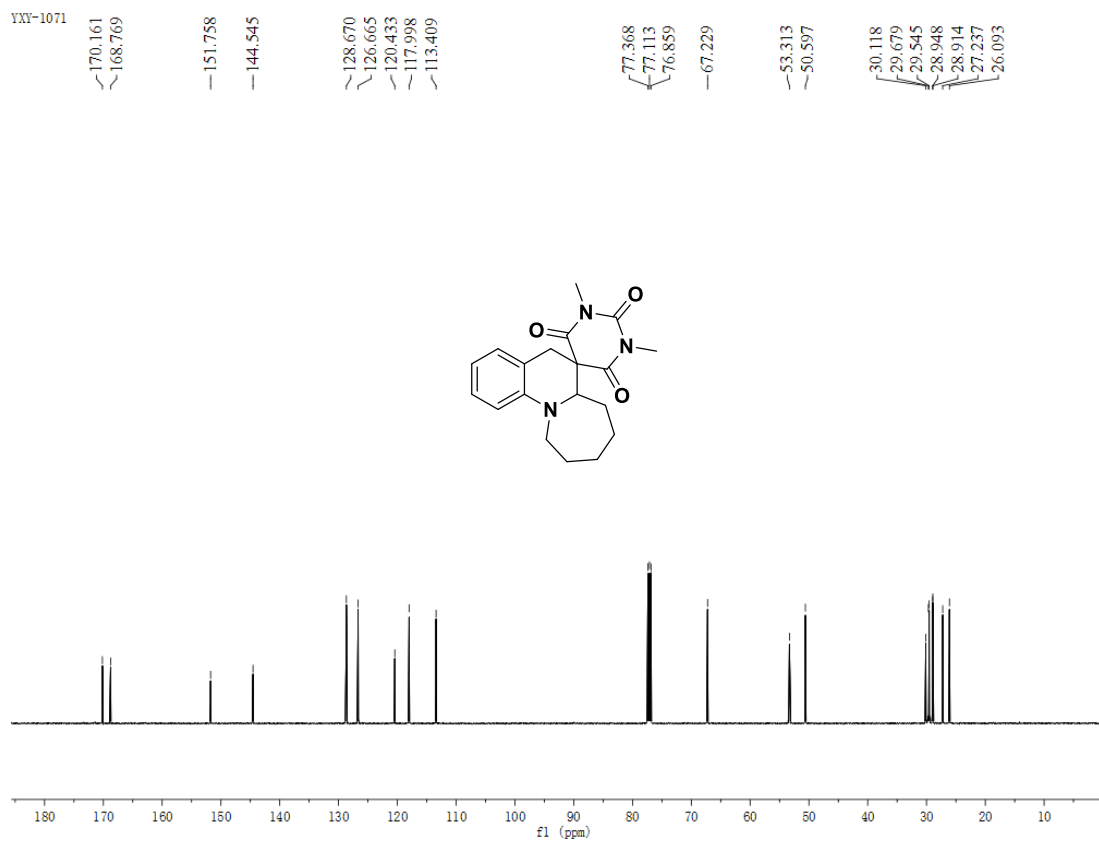



**6a,7,8,9,10,11-hexahydro-5H-spiro[azepino[1,2-a]quinoline-6,3'-indolin]-2'-one (3v)**

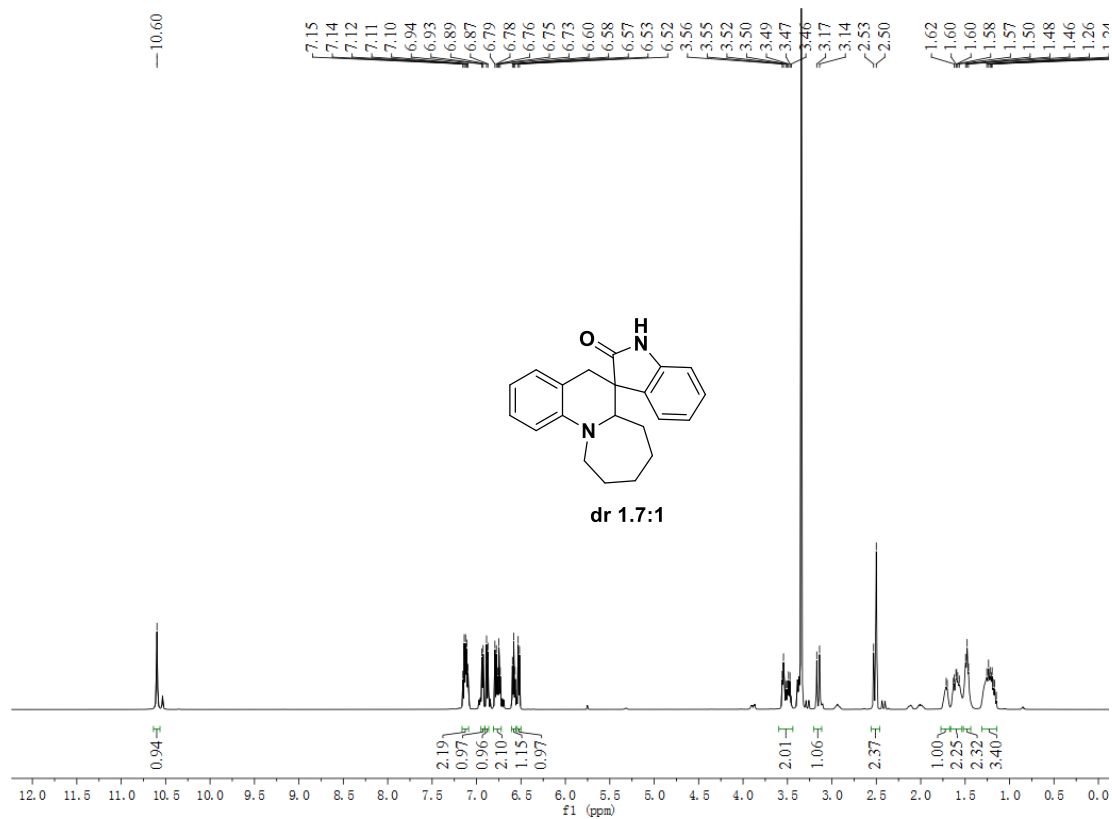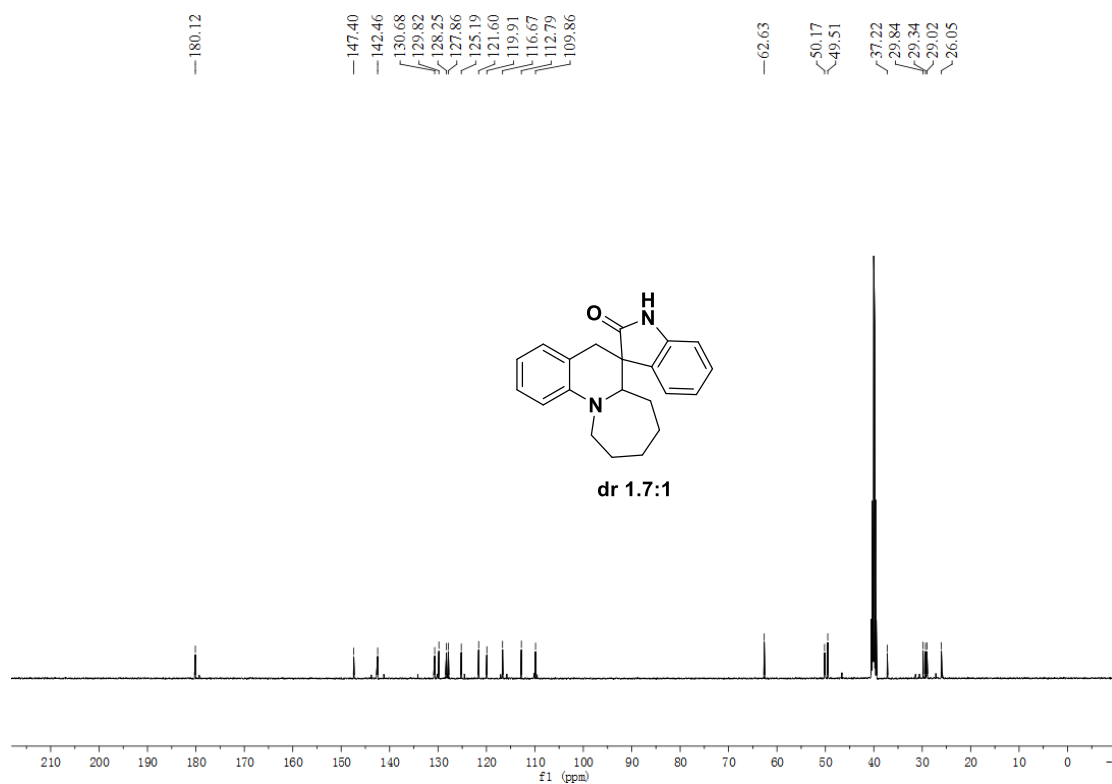

**2',4'-dimethyl-8'-nitro-1',2',4',4a'-tetrahydro-2H,6'H-spiro[pyrimidine-5,5'-[1,4]oxazino[4,3-a]quinoline]-2,4,6(1H,3H)-trione (3w)**

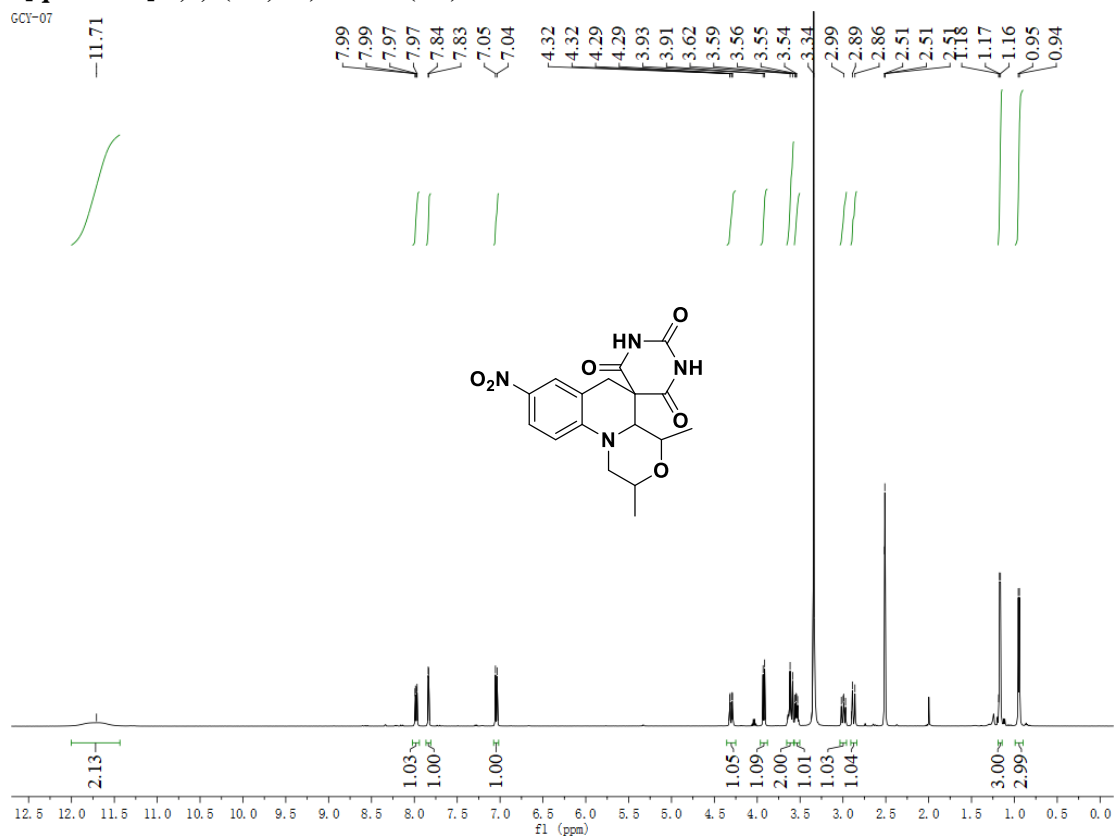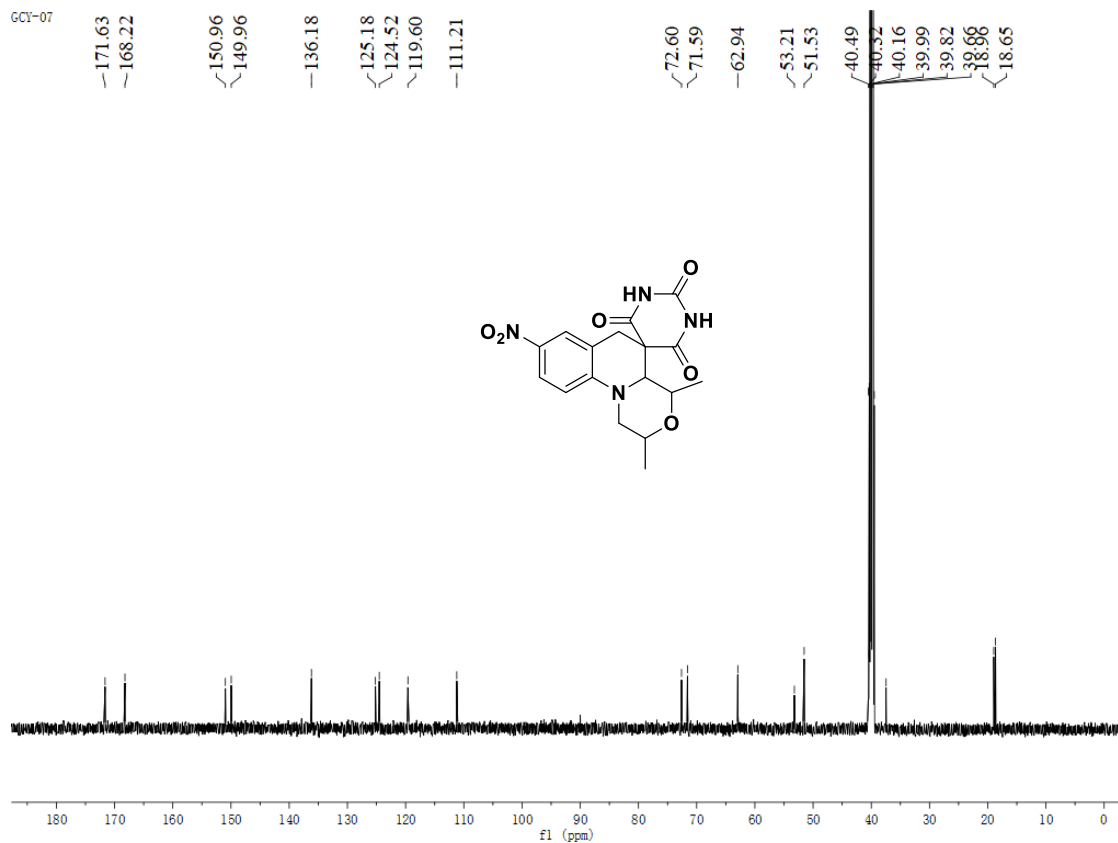

**2',4'-dimethyl-8'-nitro-2-thioxo-1',2,2',3,4',4a'-hexahydro-4H,6'H-spiro[pyrimidine-5,5'-[1,4]oxazino[4,3-a]quinoline]-4,6(1H)-dione (3x)**

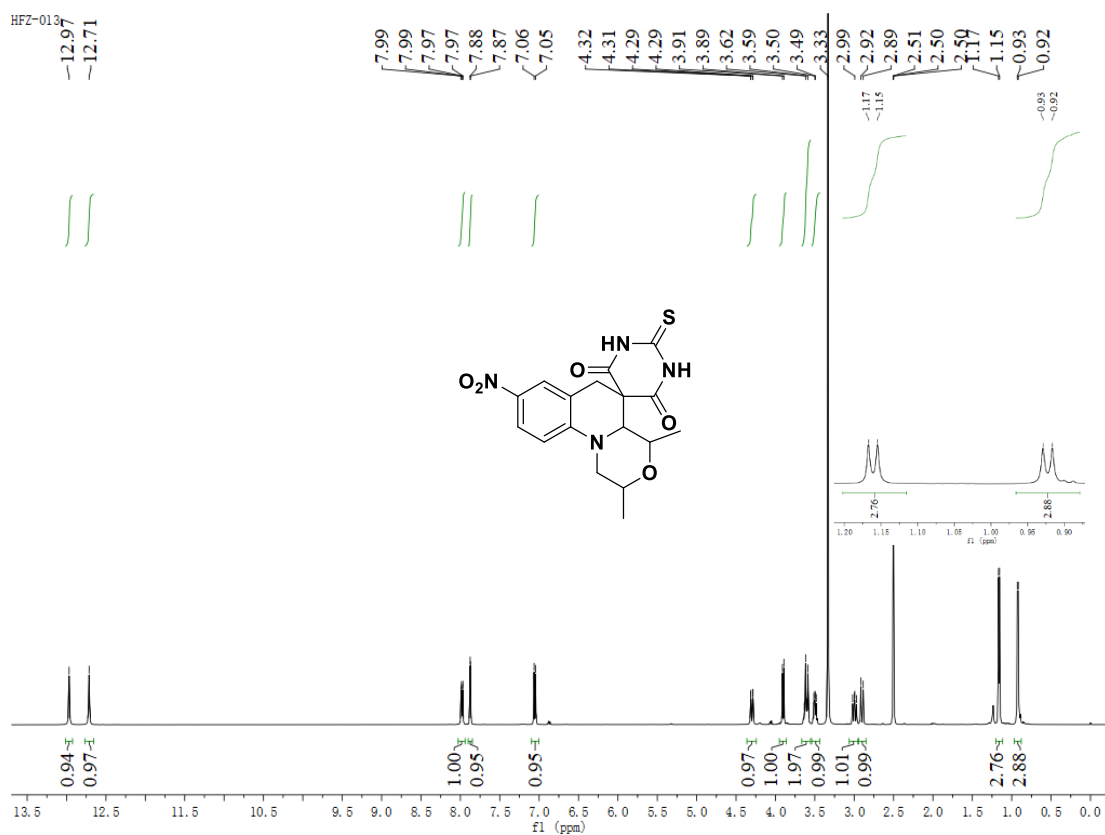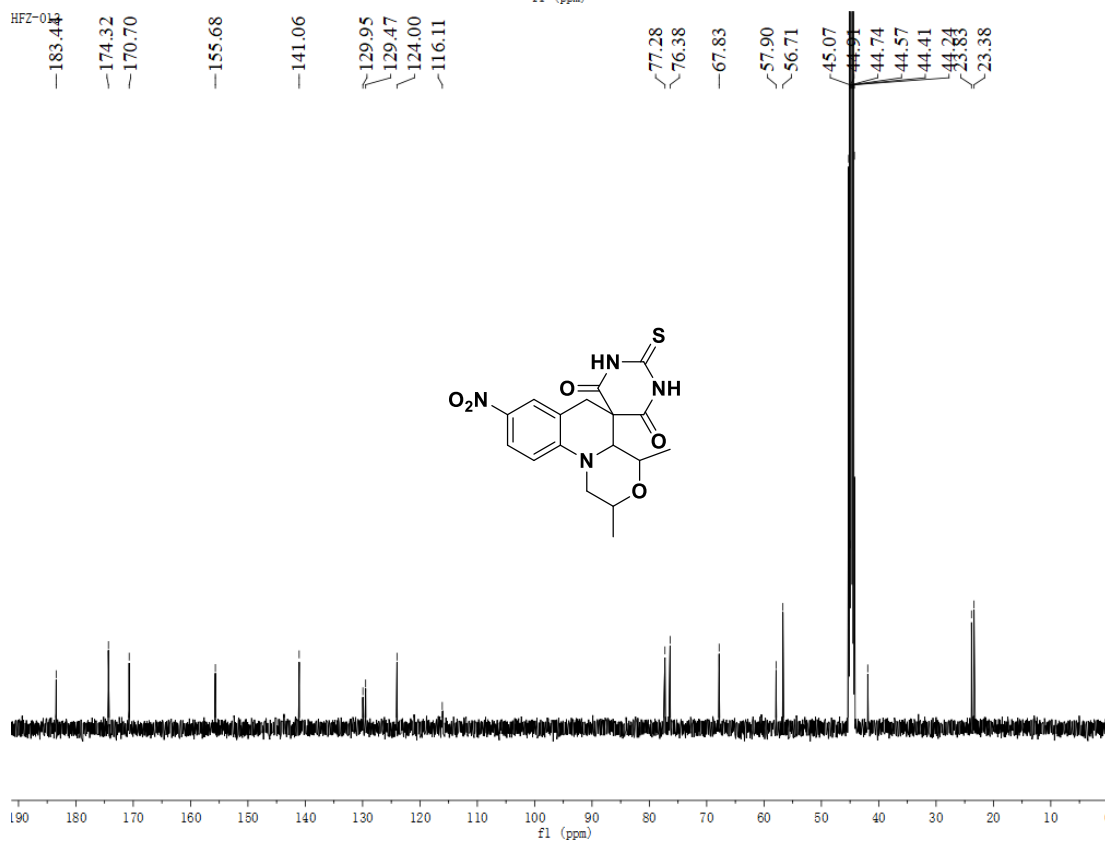

### 3-(4-chloro-2-(diethylamino)benzylidene)pentane-2,4-dione (4b)

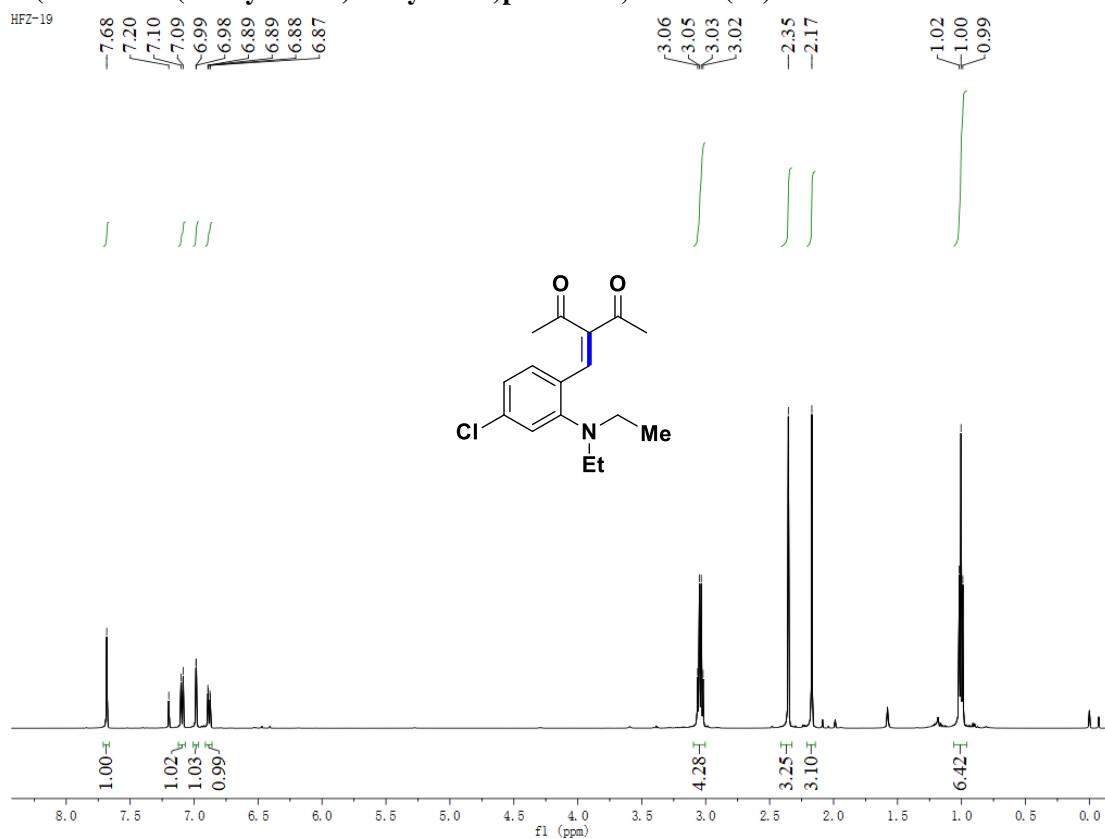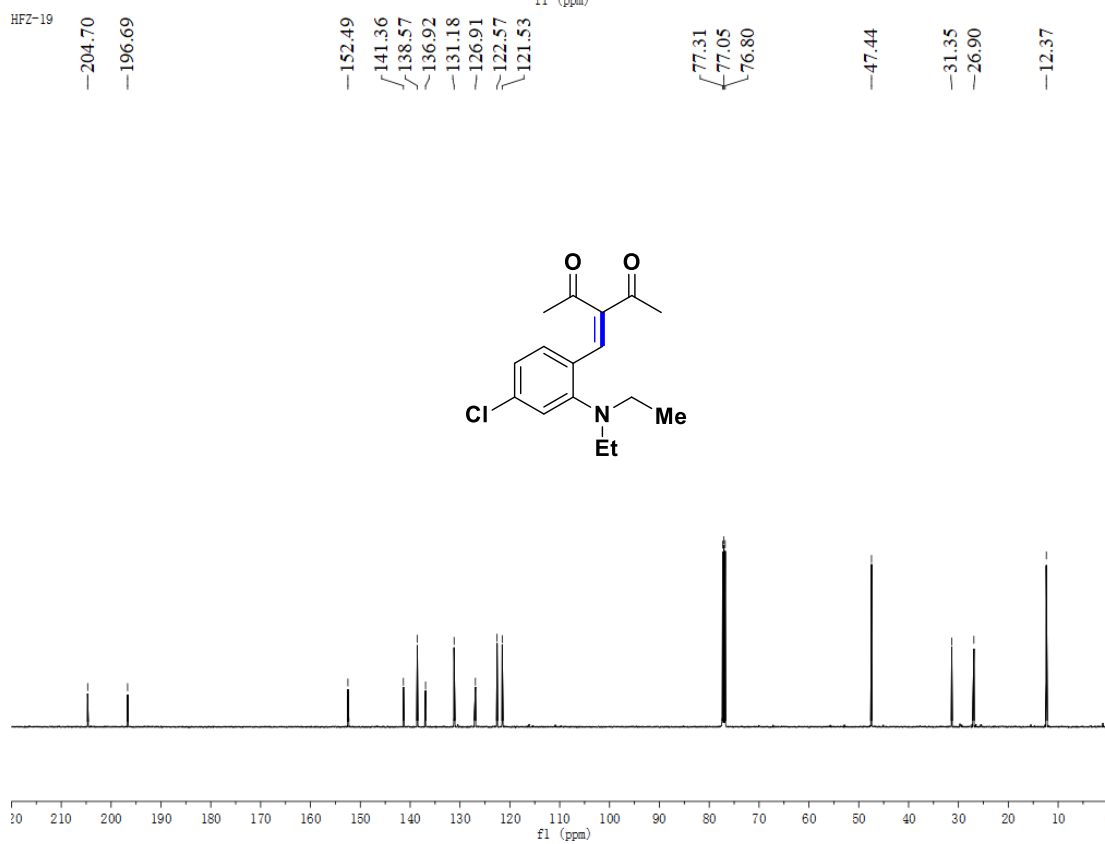

Supplement: d0ob00521e1.pdf [file d0ob00521e1.pdf]
